1 **Integration of multi-omics data improves prediction of cervicovaginal microenvironment**  
2 **in cervical cancer**

3

4 Nicholas A. Bokulich<sup>1,\*</sup>, Paweł Łaniewski<sup>2,\*</sup>, Dana M. Chase<sup>3</sup>, J. Gregory Caporaso<sup>4</sup>, Melissa M.

5 Herbst-Kralovetz<sup>2,5,#</sup>

6

7 Affiliations

8 1 Laboratory of Food Systems Biotechnology, Institute of Food, Nutrition, and Health, ETH

9 Zürich, Switzerland.

10 2 Department of Basic Medical Sciences, College of Medicine-Phoenix, University of Arizona,

11 Phoenix, AZ, USA.

12 3 Arizona Oncology, Phoenix, AZ, USA.

13 4 Center for Applied Microbiome Science, Pathogen and Microbiome Institute, Northern Arizona

14 University, Flagstaff, AZ, USA.

15 5 Department of Obstetrics and Gynecology, College of Medicine-Phoenix, University of

16 Arizona, Phoenix, AZ, USA.

17

18 \* These authors contributed equally to this work.

19

20 # Correspondence:

21 Melissa M. Herbst-Kralovetz, Ph.D.

22 425 N. 5th St., Phoenix, AZ 85004, USA

23 Phone: (602) 827-2247

24 Fax: (602) 827-2127

25 Email: mherbst1@arizona.edu

26

## 27 **Abstract**

28 Emerging evidence suggests that a complex interplay between human papillomavirus (HPV),  
29 microbiota, and the cervicovaginal microenvironment contribute to HPV persistence and  
30 carcinogenesis. Integration of multiple omics datasets is predicted to provide unique insight into  
31 HPV infection and cervical cancer progression. Cervicovaginal specimens were collected from a  
32 cohort (n=100) of Arizonan women with cervical cancer, cervical dysplasia, as well as HPV-  
33 positive and HPV-negative controls. Microbiome, immunoproteome and metabolome analyses  
34 were performed using 16S rRNA gene sequencing, multiplex cytometric bead arrays, and liquid  
35 chromatography-mass spectrometry, respectively. Multi-omics integration methods, including  
36 neural networks (mmvec) and Random Forest supervised learning, were utilized to explore  
37 potential interactions and develop predictive models. Our integrated bioinformatic analyses  
38 revealed that cancer biomarker concentrations were reliably predicted by Random Forest  
39 regressors trained on microbiome and metabolome features, suggesting close correspondence  
40 between the vaginal microbiome, metabolome, and genital inflammation involved in cervical  
41 carcinogenesis. Furthermore, we show that features of the microbiome and host  
42 microenvironment, including metabolites, microbial taxa, and immune biomarkers are predictive  
43 of genital inflammation status, but only weakly to moderately predictive of cervical cancer state.  
44 Different feature classes were important for prediction of different phenotypes. Lipids (e.g.  
45 sphingolipids and long-chain unsaturated fatty acids) were strong predictors of genital  
46 inflammation, whereas predictions of vaginal microbiota and vaginal pH relied mostly on  
47 alterations in amino acid metabolism. Finally, we identified key immune biomarkers associated  
48 with the vaginal microbiota composition and vaginal pH (MIF and TNF $\alpha$ ), as well as genital  
49 inflammation (IL-6, IL-10, leptin and VEGF). Integration of multiple different microbiome “omics”  
50 data types resulted in modest increases in classifier performance over classifiers trained on the

51 best performing individual omics data type. However, since the most predictive features cannot  
52 be known *a priori*, a multi-omics approach can still yield insights that might not be possible with  
53 a single data type. Additionally, integrating multiple omics datasets provided insight into different  
54 features of the cervicovaginal microenvironment and host response. Multi-omics is therefore  
55 likely to remain essential for realizing the advances promised by microbiome research.

56 Running title: Multi-omics and cervicovaginal cancer microenvironment

57 Keywords: immunoproteome; metabolome; microbiome; HPV; cervical carcinogenesis; genital  
58 inflammation; supervised learning

59

60

## 61 **Background**

62           Despite the availability of preventive measures, such as routine human papillomavirus  
63 (HPV) vaccination and Pap smear screening, cervical cancer remains a major public health  
64 problem, particularly in low- and middle-income countries, with approximately 570,000 new  
65 cases and 311,000 deaths worldwide in 2018 (1). From an epidemiological standpoint, infection  
66 with high-risk HPV types is a well-established risk factor for cervical cancer (2). Genital HPV  
67 infection, although necessary, is not sufficient for development of precancerous cervical  
68 dysplasia and progression to cancer (3), suggesting that other factors in the local cervicovaginal  
69 microenvironment play a role during cervical carcinogenesis (4).

70           In the last two decades, the human microbiome (collectively the microbiota, or  
71 communities of microorganisms residing in and on the human body, and their theatre of activity  
72 (5) has emerged as a key regulator of mucosal homeostasis at various body sites, including the  
73 female reproductive tract (6). The cervix and vagina in the majority of healthy, reproductive-age  
74 women are colonized by one or few *Lactobacillus* species, primarily *L. crispatus*, *L. iners*, *L.*  
75 *gasseri*, or *L. jensenii* (7). These beneficial microorganisms produce lactic acid (lowering vaginal  
76 pH, typically below 4.5) and other antimicrobial metabolites, as well as block attachment of other  
77 bacteria to the genital epithelium through competitive exclusion mechanisms. In addition,  
78 *Lactobacillus* spp. stimulate the host to secrete physiological levels of cytokines, antimicrobial  
79 peptides and metabolites (8).

80           Collectively, multifaceted interactions between *Lactobacillus* and the host create a  
81 protective microenvironment against invading bacteria, fungi and viruses, including HPV (9).  
82 However, during dysbiosis (disruption of the local microbial ecosystem, such as during disease)  
83 protective *Lactobacillus* spp. are depleted and replaced by a diverse consortium of obligate and  
84 strict anaerobes, resulting in elevated vaginal pH (10). These changes are associated with  
85 increased risk for adverse gynecologic and reproductive outcomes, including sexually  
86 transmitted infection (STI) acquisition (11). Indeed, several clinical studies have demonstrated

87 that HPV infection associates with substantial changes in the cervicovaginal microenvironment,  
88 including shifts in microbial (12-28), metabolic (29, 30) and immunoproteomic profiles (17, 18,  
89 31, 32), as well as vaginal pH levels (17), which might drive HPV persistence and/or disease  
90 progression.

91 Multiple cross-sectional studies in various racial/ethnic cohorts consistently  
92 demonstrated that women infected with HPV exhibit more diverse vaginal microbiota and  
93 depleted levels of beneficial *Lactobacillus* spp. compared to HPV-negative women (12-15).  
94 Women with cervical dysplasia or cancer also commonly lacked *Lactobacillus* dominance in  
95 their vaginal microbiota (16-21). Furthermore, bacterial vaginosis (BV), which is a common  
96 vaginal disorder characterized by a dramatic shift in microbiota composition from *Lactobacillus*  
97 to anaerobes, has been linked to an increased risk of HPV acquisition and persistence (33-35).  
98 Limited longitudinal studies also demonstrated that *Lactobacillus*-dominant microbiota correlates  
99 with HPV clearance and regression of dysplasia, whereas depletion of *Lactobacillus* and  
100 presence of specific anaerobic bacteria is associated with HPV and disease persistence (22-  
101 25). Recent systematic reviews and meta-analyses of available studies supported a causal link  
102 between dysbiotic vaginal microbiota and cervical cancer through the impact of bacteria on HPV  
103 acquisition and persistence, as well as dysplasia development (26-28).

104 Metabolically, limited studies have reported that HPV infection and cervical dysplasia  
105 relate to depletion of amino acid, peptide, and nucleotide signatures in the cervicovaginal  
106 microenvironment (29, 30). Intriguingly, these metabolic alterations are also associated with  
107 depletion of *Lactobacillus* spp., connecting HPV infection to vaginal dysbiosis (29, 36). In  
108 contrast, cervical carcinoma profoundly perturbs lipid signatures, such as sphingomyelins (29),  
109 which are also biomarkers of chronic inflammation (37) and associated with genital inflammation  
110 (29).

111 In regard to host immune defenses, it is well documented that persistent HPV infection  
112 suppresses immune responses, which may contribute to progression of HPV-mediated

113 neoplasm (38). Yet, the impact of the microbiome on host defenses across cervical  
114 carcinogenesis has not been comprehensively studied. Recent studies have revealed that  
115 dysbiotic non-*Lactobacillus* dominant microbiota are associated with elevated levels of pro-  
116 inflammatory cytokines, growth and angiogenesis factors, apoptosis-related proteins, and  
117 immune checkpoint proteins in the cervicovaginal fluids (17, 31, 32). Another cross-sectional  
118 study suggested a link between dysbiotic fusobacteria and immunosuppressive host responses  
119 (18). Taken together, these reports strongly implicate the complex interplay between HPV,  
120 microbiota, and host response mechanisms in the local microenvironment in the progression of  
121 (or protection from) neoplastic disease.

122         Here we present an integrated multi-omics analysis of clinical datasets including vaginal  
123 microbiome (17), vaginal pH (17), metabolome (29) and immunoproteome (17, 31, 32), which  
124 were previously generated using cervicovaginal specimens collected from a cohort ( $n=100$ ) of  
125 women with cervical cancer, cervical dysplasia, as well as HPV-positive and HPV-negative  
126 controls, but which were previously analyzed independently. Cervical cancer disease  
127 phenotypes emerge from the interactions between multiple features, including microbial taxa,  
128 metabolic activity of microbes, host immune system activity, and the vaginal microenvironment.  
129 Hence, we hypothesized that applying newly developed multi-omics integration techniques,  
130 including microbe–metabolite vectors (mmvec (39)) neural networks and Random Forest  
131 supervised learning models to delineate relationships between microbial, metabolic, and  
132 proteomic signatures across a cervical carcinogenesis spectrum would allow us to learn more  
133 from these data than we could from any single data type in isolation. We present new predictive  
134 models of *Lactobacillus* dominance, vaginal pH, genital inflammation and cervical neoplastic  
135 disease, and discuss the relative contribution of different features and feature types to our top-  
136 performing models (**Figure 1**).

137 **Methods**

138 **Study population and clinical sample collection**

139 One hundred premenopausal, non-pregnant women were recruited at three clinical sites located  
140 in Phoenix, AZ: St. Joseph's Hospital and Medical Center, University of Arizona Cancer Center  
141 and Maricopa Integrated Health Systems. All participants provided informed written consent and  
142 all research and related activities involving human subjects were approved by the Institutional  
143 Review Boards at each participating site. The participants were grouped as follows: HPV-  
144 negative controls [Ctrl HPV- ( $n=20$ )], HPV-positive controls [Ctrl HPV+ ( $n=31$ )], low grade  
145 squamous intraepithelial lesions [LSIL ( $n=12$ )], high grade squamous intraepithelial lesions  
146 [HSIL ( $n=27$ )] and invasive cervical carcinoma [ICC ( $n=10$ )]. Classification of patients into the  
147 five groups and detailed exclusion criteria were described previously (Łaniewski et al., 2018).  
148 Cervicovaginal lavage (CVL) and vaginal swabs were collected by a physician and processed  
149 as described previously (17). Vaginal pH was measured using vaginal swabs, nitrazine paper  
150 and a pH scale ranging from 4.5 to 7.5 (17). Demographic data was collected from surveys  
151 and/or medical records.

152

153 **Immunoproteome analysis**

154 Levels of 73 protein targets were determined in CVL samples using multiplex cytometric bead  
155 arrays or enzyme-linked immunosorbent assays and described previously (17, 31, 32). Briefly,  
156 protein levels were measured using customized MILLIPLEX MAP® Human  
157 Cytokine/Chemokine, Th17, High Sensitivity T Cell, Circulating Cancer Biomarker and Immuno-  
158 Oncology Checkpoint Protein Magnetic Bead Panels (Millipore, Billerica, MA) or Human IL-36γ  
159 ELISA kit (RayBiotech, Norcross, GA) in accordance with the manufacturer's protocol. Data  
160 were collected with a Bio-Plex® 200 instrument and analyzed using Manager 5.0 software (Bio-  
161 Rad, Hercules, CA). The genital inflammatory score system used in this study was described  
162 previously (17). Briefly, levels of seven cytokines (IL-1α, IL-1β, IL-8, MIP-1β, MIP-3α, RANTES,

163 and TNF $\alpha$ ) were used to determine inflammatory scores; patients were assigned one point for  
164 each mediator when the level was in the upper quartile. Patients with inflammatory scores 5-7  
165 were considered to have high genital inflammation, whereas patients with inflammatory scores  
166 1-4 to have low genital inflammation. Patients with inflammatory score 0 were assigned to have  
167 no genital inflammation.

168

169

### 170 **Metabolome analysis**

171 Global metabolome analysis was performed by Metabolon, Inc (Durham, NC) and described  
172 previously (29). Briefly, a Waters ACQUITY ultra-performance liquid chromatography (UPLC)  
173 and a Thermo Scientific Q-Exactive high resolution/accurate mass spectrometer interfaced with  
174 a heated electrospray ionization (HESI-II) source and Orbitrap mass analyzer operated at  
175 35,000 mass resolution were utilized. Metabolites were identified and quantified using  
176 Metabolon's Laboratory Information Management Systems (LIMS).

177

### 178 **Amplicon library preparation and sequencing for microbiome analysis**

179 DNA extraction and 16S rRNA gene sequencing were described previously (17). Briefly, DNA  
180 was extracted from vaginal swabs using PowerSoil DNA Isolation Kit (MO BIO Laboratories,  
181 Carlsbad, CA) following the manufacturer's instructions. Amplicon library preparation and  
182 sequencing were performed by the Second Genome Inc. (San Francisco, CA). Briefly, the V4  
183 region of bacterial 16S rRNA gene was amplified from the genomic DNA obtained from vaginal  
184 swabs and sequenced on the MiSeq platform (Illumina, San Diego, CA).

185

### 186 **Bioinformatics analysis**

187 Microbial DNA sequence data were processed and analyzed using the plugin-based  
188 microbiome bioinformatics framework QIIME 2 version 2019.7 (40). DADA2 (41) was used (via



189 the q2-dada2 QIIME 2 plugin) to quality filter the sequence data, removing PhiX, chimeric, and  
190 erroneous reads, and merge paired-end reads. Forward and reverse reads were trimmed to 250  
191 nt prior to denoising with dada2, otherwise default parameter settings were used. Taxonomy  
192 was assigned to sequence variants using q2-feature-classifier (42) with the classify-sklearn  
193 naive Bayes classification method against (1) the GreenGenes 16S rRNA reference database  
194 13\_8 release (43) assuming a uniform taxonomic distribution (44); (2) the Genome Taxonomy  
195 Database (GTDB) (45), assuming a uniform taxonomic distribution; and (3) GTDB, with  
196 taxonomic class weights (expected species distributions) assembled from a collection of 1,017  
197 human cervicovaginal microbiota samples derived from the Vaginal Human Microbiome Project  
198 (the same reference set used to construct the STIRRUPS database (46)) using q2-clawback  
199 (44). RESCRIPT (<https://github.com/bokulich-lab/RESCRIPT>) (47) was used to merge these  
200 taxonomies via determination of the last common ancestor (LCA) consensus taxonomy  
201 assignment for each feature (giving priority to majority classifications, and using superstring  
202 matching to facilitate compatibility between the Greengenes and GTDB taxonomies). Any  
203 sequence that failed to classify at phylum level was discarded prior to downstream analysis.  
204 Microbial feature tables were evenly sampled at 50,000 sequences per sample prior to  
205 supervised classification.

206 Supervised learning was performed in q2-sample-classifier (48) via 10-fold nested cross-  
207 validation (classify-samples-ncv method), using random forests classification or regression  
208 models [<https://doi.org/10.1023/A:1010933404324>] grown with 500 trees. Receiver operating  
209 characteristic (ROC) curves and area under the curve (AUC) analysis, confusion matrices, and  
210 feature importance scores were generated as part of the q2-sample-classifier pipeline.

211 Supervised learning models were trained and tested using the following feature and target data:

- 212 1. Disease status was predicted using bacterial 16S rRNA gene ASV abundance,  
213 metabolome, and immunoproteome data.

- 214 2. *Lactobacillus* dominance was predicted using metabolome and immunoproteome data.  
215 *Lactobacillus* dominance categorization was based on the relative frequency of reads  
216 classified to genus *Lactobacillus* via 16S rRNA gene sequencing; any sample with  $\geq$   
217 80% of reads classified as *Lactobacillus* were placed in the *Lactobacillus* dominant (LD)  
218 group, and all other samples in the non-*Lactobacillus* dominant (NLD) group.
- 219 3. Vaginal pH was predicted using bacterial 16S rRNA gene ASV abundance, metabolome,  
220 and immunoproteome data.
- 221 4. Genital inflammation scores were predicted using bacterial 16S rRNA gene ASV  
222 abundance, metabolome, and immunoproteome data (excluding the 7 immunoproteome  
223 markers that are used to calculate the inflammation score).
- 224 5. Immunoproteome markers (the abundance of each individual marker) was predicted  
225 using metabolome and bacterial 16S rRNA gene ASV abundance data.
- 226 6. Metabolite abundance (the abundance of each individual metabolite) was predicted  
227 using immunoproteome and bacterial 16S rRNA gene ASV abundance data.
- 228 AUC was calculated using scikit-learn (49) for each class, as well as micro- and macro-  
229 averages. Micro-average is calculated across each sample, and hence impacted by class  
230 imbalances. Macro-average gives equal weight to the classification of each sample, eliminating  
231 the impact of class imbalances on average AUC.
- 232 Microbe-metabolite interactions were estimated using mmvec (39). This method uses  
233 neural networks for estimating microbe-metabolite interactions through their co-occurrence  
234 probabilities. Features with fewer than 10 observations were filtered prior to mmvec analysis.  
235 Conditional rank probabilities were used to construct principal coordinate analysis biplots  
236 (visualized using matplotlib [10.1109/MCSE.2007.55]) that illustrate the co-occurrence  
237 probabilities of each metabolite and microbe.

238

## 239 **Results**

240 Interconnection of vaginal microbiome, metabolome, and immune biomarkers

241 Microbe-metabolite interactions were predicted using mmvec (39). This method uses neural  
242 networks to estimate microbe-metabolite interactions through their co-occurrence probabilities.

243 This method predicted several strong microbe-metabolite associations. Numerous lipids

244 (including sphingolipids and long-chain unsaturated fatty acids) were associated with multiple

245 amplicon sequence variants (ASVs) belonging to *Prevotella* (including *Prevotella bivia*),

246 *Peptoniphilus*, *Streptococcus anginosus*, *Atopobium vaginae*, *Sneathia sanguinegenes*,

247 *Veillonellales*, *Finegoldia*, and other taxonomic groups (**Figure 2**). *Lactobacillus* ASVs

248 (*Lactobacillus crispatus*, *Lactobacillus iners*, *Lactobacillus\_H*), as well as some *Prevotella*

249 (including *Prevotella bivia*), and other ASVs, were correlated with a range of metabolites

250 including phenylalanylglycine, the anti-inflammatory nucleotide cytosine,

251 glycerophosphoglycerol, glycerol, N-acetyl methionine sulfoxide, and maltopentaose (**Figure 2**).

252 These separations roughly mirror genital inflammation and disease status categories,

253 corresponding with our present findings (described below) as well as previous work showing

254 association between many of these lipids with ICC and high inflammation, and these non-lipid

255 metabolites with high *Lactobacillus* dominance and low inflammation (17, 29). Three-

256 hydroxybutyrate, previously associated with ICC (29), as well as piperolate, N-acetylcadaverine,

257 and deoxycarnitine were highly correlated with a range of *Streptococcus*, *Prevotella* (including

258 *Prevotella bivia*), *Megasphaera*, *Finegoldia*, *Atopobium vaginae*, *Sneathia amnii*, and *Sneathia*

259 *sanguinegens* ASVs. Interestingly, 3-hydroxybutyrate was also correlated to *Lactobacillus iners*.

260 To further dissect relationships among the metabolite, microbiome, and

261 immunoproteome, Random Forest regression with 10-fold cross-validation was used to

262 determine the ability to predict the abundance of individual metabolites based on microbiome

263 and immunoproteome profiles, revealing very strong predictive strength for a wide variety of

264 targets (**Supplementary Figure 1, Supplementary Table 1**). This includes the inflammation-  
265 and ICC-associated lipids 1-palmitoyl-2-arachidonoyl-gpc (16:0/20:4), 1-palmitoyl-2-linoleoyl-  
266 gpc (16:0/18:2), 1,2-dilinoleoyl-gpc (18:2/18:2), 1-palmitoyl-2-docosahexaenoyl-gpc (16:0/22:6),  
267 several sphingomyelins, 1-stearoyl-2-docosahexaenoyl-gpc (18:0/22:6), 1-linoleoyl-2-  
268 arachidonoyl-gpc (18:2/20:4n6), 1-palmitoyl-2-arachidonoyl-gpc (16:0/20:4n6), arachidonate,  
269 and the bile acid glycochenodeoxycholate (**Supplementary Figure 1, Supplementary Table**  
270 **1**). Many of these associations are driven by high abundances of these lipids, sphingomyelins,  
271 and other metabolites in cancer cases: cancer biomarkers are the top predictive features for all  
272 of these metabolites (**Supplementary Figure 2**), and when ICC cases are removed from the  
273 dataset microbial features (including several *Sneathia*, *Atopobium*, *Prevotella*, *Fingoldia*, and  
274 *Mobiluncus* ASVs) are included among the top predictive features, though high predictive  
275 strength remains for many (but not all) of these targets (**Supplementary Figure 3-4**). The ability  
276 to accurately predict the abundance of these metabolites through cross-validation highlights the  
277 close correspondence between the metabolome, microbiome, and immunoproteome across  
278 patients, both respective and irrespective of cancer diagnosis.

279 Random Forest regression was also performed to predict concentration of cancer  
280 biomarkers based on microbiome and metabolome profiles, demonstrating strong predictive  
281 strength for several targets, including proinflammatory cytokines and chemokines (IL-6, IL-8, IL-  
282 36 $\gamma$ , MIF, MIP-1 $\beta$ ), the anti-inflammatory cytokine IL-10, growth and angiogenic factors (HGF,  
283 SCF, TGF- $\alpha$ ), apoptosis-related proteins (sFAS, TRAIL), the hormone prolactin, the cytokeratin  
284 CYFRA21-1, and other cancer biomarkers (AFP, sCD40L, CEA) ) (**Supplementary Figure 5**).  
285 Metabolites (primarily inflammation-associated lipids) are the most predictive features for each  
286 of these targets, but microbial features occur among the top 15 predictive features for many of  
287 these, most notably *Adlercreutzia* (*Eggerthellaceae*), *Megasphaera*, *Sneathia*, and *Parvimonas*  
288 dominating the top important features for predicting cervicovaginal CEA concentration,  
289 regardless of cancer diagnosis (**Supplementary Figure 6**). Several of these biomarkers are

290 clearly related to ICC, as indicated by reduced predictive strength after ICC cases are removed  
291 from the dataset; however, most of these markers exhibit similar performance and important  
292 feature associations after removing ICC cases (**Supplementary Figures 7-8**).

293         These findings indicate that both the metabolome and microbiome are highly correlated  
294 with and predictive of cancer biomarker concentrations in the cervicovaginal mucosa. Hence,  
295 metabolome and microbiome composition can be considered proxy measurements for genital  
296 inflammation and immunological responses linked to cervicovaginal carcinogenesis, a  
297 relationship that is more explicitly tested below.

298

### 299 **Metabolome and immunoproteome markers predict *Lactobacillus* dominance and vaginal** 300 **pH.**

301 We have previously demonstrated significant negative correlations between *Lactobacillus*  
302 dominance (LD), genital inflammation, HPV infection, and ICC (17). Lactobacilli typically  
303 dominate the cervicovaginal microbiota of healthy premenopausal women. However, in some  
304 women, cervicovaginal microbiota lacks a high proportion of lactobacilli and consists of a  
305 consortium of anaerobic bacteria. Intriguingly, Hispanic and black women more frequently  
306 exhibit non-*Lactobacillus*-dominant (NLD) microbiota than white or Asian women, which might  
307 relate to multiple socioeconomic, environmental and behavioral factors all of which may arise as  
308 a result of structural racism (4). LD is associated with low genital inflammation and lower risk of  
309 HPV acquisition, persistence and development of precancerous cervical dysplasia (26, 27).  
310 Hence, we evaluated the ability of metabolome and immunoproteome features to predict LD, as  
311 a proxy for their association with vaginal health in the Arizona-based cohort of women in this  
312 study (comprising both non-Hispanic white women (NHW) and women of Hispanic origin). We  
313 define LD as any sample in which *Lactobacillus* ASVs collectively comprise  $\geq 80\%$  of the vaginal  
314 microbiome, and grouped subjects into LD and NLD groups. We then predicted LD status based  
315 on metabolome and immunoproteome profile using random forest classification with 10-fold

316 cross-validation. Microbiome data were excluded from the predictive model, as these  
317 measurements are non-independent due to compositionality constraints, i.e., changing the  
318 relative abundance of one feature (such as a *Lactobacillus* ASV) will alter the relative  
319 abundance of other features.

320 Results demonstrate a very high predictive accuracy (average AUC = 0.94), indicating a  
321 near-perfect ability to predict LD or NLD across subjects via cross-validation (**Figure 3A-B**). In  
322 other words, cervicovaginal metabolome and immunoproteome profiles are tightly linked to the  
323 abundance of *Lactobacillus* spp., suggesting that host immunological response is associated  
324 with cervicovaginal microbiome composition. The top predictive features consist primarily of  
325 non-lipid metabolites, consistent with the mmvec results (**Figure 2**), though the cancer  
326 biomarkers macrophage migration inhibitory factor (MIF) and TNF $\alpha$  also rank among the top 50  
327 most important predictive features (**Figure 3C**). Both MIF and TNF $\alpha$  are more abundant in NLD  
328 women (**Supplementary Figure 9**), consistent with higher inflammation and ICC.

329 Vaginal pH is an important feature of the cervicovaginal microenvironment which relates  
330 to *Lactobacillus* dominance. Briefly, vaginal *Lactobacillus* spp. utilize glycogen by-products in  
331 the process of fermentation and produce lactic acid, which acidifies the local microenvironment  
332 typically to pH below 4.5. This acidic microenvironment contributes to homeostasis and protects  
333 the host against invading pathogens and pathobionts. We assessed the predictive relationship  
334 between pH and cervicovaginal metabolites, microbiota, and immunoproteome using cross-  
335 validated random forest classification models. For the purposes of this analysis, samples were  
336 grouped into “low” (pH  $\leq$  5.0) and “high” pH groups (pH  $>$  5.0). Lower vaginal pH is closely  
337 related to demographic characteristics, and Hispanic women tend to have slightly higher  
338 average vaginal pH compared to NHW (7, 17), hence we defined pH  $\leq$  5.0 as “low” for the  
339 purposes of this study. Results indicate a weak to moderate predictive relationship (AUC = 0.70)  
340 (**Figure 4A**). Predictive power was lost because a large proportion (35.3%) of women with low  
341 vaginal pH were predicted to belong to the high pH group (**Figure 4B**). This characteristic

342 merely indicates that 5.0 is not a reasonable cutoff for the purposes of this analysis; predicting  
343 true vaginal pH using a regression model would be more appropriate to characterize the  
344 numerical relationship between vaginal pH and the cervicovaginal environment but the small  
345 sample size in the current study, strongly skewed toward lower pH values (**Supplementary**  
346 **Figure 10**), prevented the use of cross-validated regression models to evaluate what is likely a  
347 more integrative relationship than binary classification can achieve. Results also indicate that  
348 this binary pH model, as expected, exhibits many of the same characteristics as the LD/NLD  
349 prediction model: many of the same top predictive features were identified (**Figure 4C**). Notably,  
350 the top predictive features consist primarily of non-lipid metabolites, and both MIF and TNF $\alpha$  are  
351 again in the top 50 most important predictors, both associated with high pH as well as NLD  
352 (**Supplementary Figures 9 and 11**). Hence, together these findings recapitulate the  
353 associations between LD, low vaginal pH, and low inflammation, and between NLD, high pH,  
354 higher inflammation, and carcinogenesis, as well as the microbial and metabolic context of  
355 these states, explored in more detail below.

356

### 357 **Metabolome, immunoproteome, and microbiome accurately predict genital inflammation** 358 **but only moderately predict cancer status**

359 Next, we tested the relationship between the cervicovaginal environment and genital  
360 inflammation, as a crucial characteristic of ICC progression. We have previously utilized a  
361 scoring system to quantify genital inflammation in our cohort (17). To assign genital  
362 inflammatory scores (0-7), levels of seven cytokines and chemokines, including IL-1 $\alpha$ , IL-1 $\beta$ , IL-  
363 8, MIP-1 $\beta$ , MIP-3 $\alpha$ , RANTES, and TNF $\alpha$ , were measured in cervicovaginal lavages (CVL) and  
364 patients were assigned a score based on whether the level of each immune mediator was in the  
365 upper quartile. For the purposes of classification, subjects were grouped into no (score = 0), low  
366 (0 < score < 5), or high inflammation (score  $\geq$  5) groups, and random forest classifiers were  
367 trained and tested via 10-fold cross-validation to assess the ability to predict genital



368 inflammation across subjects based on cervicovaginal microbiome, metabolome, and  
369 immunoproteome (excluding the 7 inflammatory markers that are used to measure inflammatory  
370 score). Results indicate moderately high predictive accuracy (macro-average AUC = 0.86)  
371 (**Figure 5A**). Predictive accuracy is very good for high (AUC = 0.93) and no inflammation (AUC  
372 = 0.90), but lowest for low inflammation (AUC = 0.75), due to misclassification of some samples  
373 as either high or no inflammation (**Figure 5B**). Similar to pH classification but to a lesser extent,  
374 this reflects the shortcoming of binning samples for classification into categorical groups, a  
375 necessary limitation due to the small sample size of the current study. Regression models  
376 predicting actual inflammation score demonstrate high accuracy at lower inflammation scores,  
377 but lower accuracy at the upper range due to sparsity of high-inflammation samples for cross-  
378 validation (**Supplemental Figure 12**). Larger sample sizes in future studies will enable more  
379 accurate prediction of low-inflammation samples through prediction of actual inflammation  
380 scores, refining our current estimates of associations between genital inflammation and  
381 cervicovaginal microenvironment. As it stands, categorical classification performs moderately  
382 well, and can identify a range of features predictive of inflammation, primarily lipids, but also  
383 several immune mediators and cancer biomarkers including IL-10, MIP-1 $\alpha$ , IL-6, VEGF, and  
384 leptin (**Figure 5C, Supplemental Figure 13**).

385         Given the ability to predict genital inflammation, a crucial feature of ICC progression,  
386 based on features of the cervicovaginal microenvironment, we sought to determine if HPV  
387 infection and carcinogenesis could also be predicted based on these features using cross-  
388 validated random forest classification. Samples ( $n=78$ ) were grouped into control HPV- ( $n=18$ ),  
389 control HPV+ ( $n=11$ ), LSIL ( $n=12$ ), HSIL ( $n=27$ ), and ICC ( $n=10$ ). This yielded low predictive  
390 accuracy (micro-average AUC = 0.73, macro-average AUC = 0.64) (**Supplemental Figure 14**).  
391 Although many of the same carcinogenesis-related metabolites and immune markers were top  
392 predictors in these models (data not shown), accurate differentiation could not be achieved,  
393 primarily because of the low sample size and large class imbalances, but also due to the large



394 number of classes with borderline differences (e.g., high similarity led to misclassification  
395 between control HPV– and control HPV+ groups, and between LSIL and HSIL groups). Given  
396 the low per-group sample sizes, approaches to mitigate class imbalances were not feasible in  
397 the current study, but larger sample sizes and pooled analyses will facilitate better estimates in  
398 future studies. However, it should be noted that ICC predictive accuracy was moderately high  
399 (AUC = 0.79), in spite of the low sample size and class imbalance (**Supplemental Figure 14**).  
400 This indicates that ICC could be predicted with fairly high accuracy across subjects, but non-ICC  
401 groups could not be reliably distinguished due to the similarities between these groups.  
402 Combining LSIL and HSIL prior to classification increases accuracy, indicating ambiguity  
403 between these groups, as reflected in the imprecise distinction between these histological  
404 classifications. Hence, ICC elicits signature characteristics in the cervicovaginal  
405 microenvironment across subjects that can be used to identify these subjects, but intermediate  
406 stages of progression (HPV infection, LSIL, HSIL) cannot be fully distinguished. Larger sample  
407 sizes and longitudinal measurement in future studies may improve our ability to diagnose ICC or  
408 even predict cancer risk based on cervicovaginal microenvironment characteristics  
409 (metabolome, immunoproteome, microbiome).

410

## 411 **Discussion**

412 The vaginal microbiota, HPV infection and cervical neoplasm are related in ways that are still  
413 not fully understood. Emerging evidence suggests that *Lactobacillus* dominance (LD) in the  
414 vagina and cervix relates to HPV clearance and disease regression, whereas dysbiotic  
415 anaerobes contribute to HPV persistence and progression of cervical neoplasm (26-28). Host  
416 response to HPV and microbiota, which may result in genital inflammation, immune evasion,  
417 and altered metabolism, likely contribute to establishment of persistent infection and disease  
418 progression (29, 30, 50-53). Thus, improving our understanding of microbiota-virus-host  
419 interactions in the local cervicovaginal microenvironment is imperative for the development of

420 novel diagnostic, preventative and therapeutic approaches, which might help reduce cervical  
421 cancer burden among unvaccinated women in the future (54).

422 We investigated relationships between multiple clinical “omics” datasets (microbiome,  
423 vaginal pH, metabolome, immunoproteome) collected from women (who had not been  
424 vaccinated against HPV) across cervical carcinogenesis (**Fig. 1**). Using recently developed  
425 integrated multi-omics bioinformatics tools, we aimed to establish predictive models and identify  
426 key signatures related to vaginal microbiota structure, vaginal pH, genital inflammation and  
427 cervical neoplasm status. We identified specific metabolites that were predictive of *Lactobacillus*  
428 dominance, vaginal pH, and genital inflammation (**Fig. 3–5**). These findings demonstrate that  
429 vaginal microbiota and host defense responses strongly influence cervicovaginal metabolic  
430 fingerprints (29, 30, 55) and indicate that cervicovaginal metabolic signatures might be  
431 promising biomarkers for gynecological conditions, including cervical cancer. In addition, select  
432 immune mediators and cancer biomarkers also exhibited high importance scores in our  
433 analyses for predictions of LD and vaginal pH (MIF and TNF $\alpha$ ), as well as genital inflammation  
434 (IL-6, IL-10, leptin, VEGF), further confirming the link between vaginal microbiota and host  
435 immune responses (17, 31, 50, 56, 57). Intriguingly, microbial features did not rank among the  
436 top predictors of vaginal pH or genital inflammation. Our neural network analyses and cross-  
437 validated Random Forest classification models showed that the abundance of bacterial taxa  
438 highly corresponded to levels of key metabolites, immune mediators, and cancer biomarkers  
439 related to cervicovaginal health or dysbiosis (**Fig. 2**), suggesting tight coupling of the  
440 microbiome, metabolome, and immunoproteome.

441 Using our approach, we were unable to accurately predict cervical neoplasm status, with  
442 the exception of the cervical cancer group, which exhibited a moderate accuracy rate. Relatively  
443 low samples size and imbalance in disease classification, which are limitations of our study,  
444 might have impacted these predictions. Larger numbers of subjects as well as temporal data on  
445 subjects will likely improve predictive models in the future, and better support causal links

446 between microbial dysbiosis and HPV-mediated carcinogenesis. In addition, pathophysiological  
447 responses across the continuum of cervical neoplasm might not be uniform among patients with  
448 different disease classifications (for example CIN1 and CIN2/3). Indeed, clinical studies have  
449 shown contrasting results related to genital inflammation and cervical dysplasia. On one hand,  
450 infection with high-risk HPV types or precancerous dysplasia has not been associated with  
451 increased level of genital inflammation (17, 50, 53). On the other hand, one report showed  
452 increased inflammatory cytokines in patients with cervical dysplasia, but it did not control for  
453 microbiota composition (52). Despite not being able to predict disease status, our integrated  
454 analyses revealed that we were able to better predict the cervicovaginal microenvironment  
455 features.

456 Our integrated analyses revealed that different classes of metabolites are important for  
457 prediction of different phenotypes: lipids were strong predictors of genital inflammation, while  
458 amino acids, peptides and nucleotides were predictive of the vaginal microbiota composition.  
459 Sphingolipids and long-chain unsaturated fatty acids in particular ranked as top predictors of  
460 genital inflammation. Emerging studies have demonstrated that sphingolipids are implicated in  
461 multiple pathological processes, such as inflammatory diseases, diabetes, and cancer (58). In a  
462 previous report we showed that women with cervical cancer had elevated sphingolipids in the  
463 cervicovaginal fluids, suggesting that cancer drives associations of phospholipids with  
464 inflammation. However, we observed the correlation with inflammation even after excluding  
465 cancer patients (29). In fact, sphingolipids are bioactive metabolites, which may mediate  
466 inflammatory signaling through TNF $\alpha$  activation (37). Using neural network analysis, we also  
467 showed the co-occurrence of many lipid metabolites and dysbiotic vaginal bacterial taxa  
468 (including multiple BV-associated bacteria and *Streptococcus*), linking microbiota to  
469 inflammatory markers.

470 Predictions of vaginal microbiota and vaginal pH relied mostly on alterations in amino  
471 acid metabolism, which was in accordance with previous reports on cervicovaginal

472 metabolomes (30, 36, 55). Specifically we found that 3-hydroxybutyrate ( $\beta$ -hydroxybutyrate,  
473 BHB), a ketone body, was strongly correlated with abundance of dysbiotic bacterial species,  
474 such as *Streptococcus*, *Prevotella*, *Megasphaera*, *Atopobium* and *Sneathia*, and unexpectedly  
475 with one of predominant vaginal *Lactobacillus* spp., *L. iners*. Notably, in a longitudinal clinical  
476 study, *L. iners*-dominant vaginal microbiota has been shown to more often transition to dysbiotic  
477 NLD microbiota compared to other *Lactobacillus* spp. (59). Furthermore, *L. iners* produces a  
478 different ratio of lactic acid isoforms (60), which vary in bactericidal capacities (61); therefore,  
479 the protective role of *L. iners* in the cervicovaginal microenvironment is still questionable (62).  
480 We have previously demonstrated that 3-hydroxybutyrate (measured in the cervicovaginal  
481 fluids) is an excellent discriminator of cervical cancer patients compared to healthy controls (29).  
482 Several clinical studies also identified 3-hydroxybutyrate (but measured in serum or tissue  
483 effusions) as a potential biomarker of other gynecologic malignancies, such as endometrial  
484 cancer (63) and ovarian cancer (64, 65). Three-hydroxybutyrate has also been shown to  
485 suppress activation of NLRP3 inflammasome (66). Thus, dysbiotic cervicovaginal bacteria and  
486 *L. iners* might utilize this mechanism to evade host defense and, consequently, the  
487 inflammasome deregulation might contribute to progression of cervical neoplasm (67).

488 Other key metabolites that we identify to highly correlate with dysbiotic microbiota were  
489 piperolate and deoxycarnitine. In a previous study on metabolomes of women with BV, these  
490 two metabolites positively associated with BV status and the presence of “clue cells” (vaginal  
491 squamous epithelial cells covered with bacterial biofilm) (36), which is one of the clinical  
492 characteristics of BV. In our report, we also revealed that deoxycarnitine in cervicovaginal fluids  
493 can discriminate HPV-positive and HPV-negative women without neoplasia (29), linking vaginal  
494 dysbiosis with HPV infection. With regard to the healthy vaginal microbiota, *Lactobacillus* spp.  
495 (particularly *L. crispatus*) positively correlated with N-acetyl methionine sulfoxide, a reactive  
496 oxygen species. Production of hydrogen peroxide, another reactive oxygen species, by vaginal  
497 *Lactobacillus* spp. has been postulated to have a protective effect against invading pathogens

498 (68, 69). Similarly, an increase of N-acetyl methionine sulfoxide in the *Lactobacillus*-dominant  
499 cervicovaginal microenvironment might contribute to host protection via oxidative stress.

500 Through our integrated multi-omics approach, we also identified key immune biomarkers  
501 associated with the vaginal microbiota composition and vaginal pH, for instance MIF, a  
502 pleiotropic cytokine regulating inflammatory reactions and stress responses (70). MIF was  
503 identified as a top predictive factor of vaginal pH and LD in our Random Forest analysis, which  
504 took into account multiple different “omics” data types (**Figures 3-4**), suggesting that  
505 *Lactobacillus* colonization may be closely involved in regulating markers of genital inflammation,  
506 including MIF. In accordance with our finding, several reports have demonstrated significantly  
507 increased levels of MIF in cervicovaginal fluids of women with vaginal dysbiosis or BV  
508 compared to women with healthy LD microbiota (57, 71, 72). In a previous report we identified  
509 MIF (in cervicovaginal fluids) as a potential biomarker discriminating women with cervical cancer  
510 from women with dysplasia and healthy controls (31). Other immunohistochemical studies  
511 demonstrated overexpression of MIF cervical cancer tissues compared to healthy cervix and  
512 dysplasia (73-75). Notably, MIF has been shown to promote cell proliferation, inhibit apoptosis  
513 (74) and directly induce secretion of VEGF, an angiogenesis factor (73). Thus, elevated MIF  
514 production induced by dysbiotic vaginal microbiota might contribute to cervical carcinogenesis.  
515 Our integrated analysis further highlighted the importance of this key immune mediator, and  
516 links its expression to vaginal microbiome and metabolome characteristics.

517 Another pro-inflammatory cytokine that strongly correlated with dysbiotic microbiota and  
518 elevated pH was TNF $\alpha$ . Several clinical studies also demonstrated an increase of this cytokine  
519 in cervicovaginal fluids of women with vaginal dysbiosis or BV (57, 71, 72, 76). Similar to MIF,  
520 microbiota-induced TNF $\alpha$  might enhance cervical carcinogenesis, since this major inflammatory  
521 cytokine has been shown to exhibit not only anti-tumor, but also pro-tumor bioactivities (77).  
522 Interestingly, *in vitro* studies showed that only particular BV-associated species (for example,  
523 *Atopobium vaginae* and *Mobiluncus mulieris*, but not *Prevotella bivia*) induce TNF $\alpha$  production

524 by genital epithelial cells (76, 78-80), suggesting species-specific roles of microbes within  
525 dysbiotic polymicrobial consortia on host immunological response, which warrants further  
526 investigations. Other immune mediators and cancer biomarkers (IL-6, IL-10, leptin and VEGF)  
527 identified to be associated with genital inflammatory scores likely relate to cancer-induced  
528 inflammation rather than a host defense response to dysbiotic vaginal microbiota (31). Overall,  
529 our data indicate that mucosal inflammation is likely associated with cervical neoplasm via the  
530 effect of vaginal microbiota on induction of specific inflammatory mediators and metabolites.

531

### 532 **Integrative omics increases predictive accuracy**

533 Many of the predictive models used in this study integrate multiple omics datasets: metabolome,  
534 immunoproteome, and microbiome. We hypothesized that integrating multiple data types would  
535 lead to a cumulative increase in predictive accuracy, as accumulating more features could help  
536 refine the diagnostic signal of our random forests classifiers, different data types could yield  
537 different signature characteristics for the prediction of different subject traits (e.g., inflammation,  
538 disease state), and the combined signal could provide more subtle information to differentiate  
539 particular groupings of subjects (e.g., LD versus non-LD, disease category). To address this  
540 hypothesis directly, we evaluated the performance of each random forest classifier with different  
541 combinations of omics data types with the expectation that more data types could only yield  
542 better predictive accuracy.

543 Results indicate that integrating data led to modest increases in accuracy for most  
544 classification tasks, but with mixed results (**Figure 6**). For LD, combining multiple datasets led to  
545 very modest increases in accuracy (**Figure 6A**). Metabolites alone could predict LD status with  
546 high accuracy; immunoproteome data exhibited much poorer accuracy, but combining both data  
547 types yielded a slight increase in mean accuracy. For pH prediction, both metabolites and  
548 microbiome datasets on their own could predict pH with moderate accuracy, but

549 immunoproteome could not; integrating all three omics datasets led to a slight increase in mean  
550 accuracy (**Figure 6B**).

551         Genital inflammation was the one measurement that showed little change in accuracy  
552 with integration of multiple omics datasets (**Figure 6C**). Both metabolome and immunoproteome  
553 datasets yielded nearly identical high predictive accuracy, whereas microbiome data exhibited  
554 poor predictive accuracy. Combining all three datasets led to no change in predictive accuracy.  
555 Interestingly, for all tests combining datasets narrowed the variance in accuracy performance  
556 (**Figure 6A-C**), suggesting that even if integrating multiple omic data types does not lead to  
557 appreciably better accuracy, it could lead to improved reproducibility, but more investigation is  
558 required to assess whether this performance enhancement is observed in other studies and  
559 disease systems.

560

#### 561 **Relevance of a multi-omics approach**

562 Given that we observed only a modest increase in classifier performance accuracy with the use  
563 of multiple “omics” data types, it may seem that the benefit of including these additional data  
564 does not justify their cost. However, it is important to note that we did not know, *a priori*, which  
565 data type would provide the best predictive accuracy in this study. Furthermore, different  
566 features types were differentially useful for predicting different features of the cervicovaginal  
567 environment. Profiling different feature types therefore enabled discoveries that would not have  
568 been possible had we focused only on a single feature type (e.g., the microbiome or the  
569 metabolome).

570         Beginning to collect multi-omics data in human microbiome studies will enable a broader  
571 understanding of the complex mechanistic interplay between microbes, metabolites, the host  
572 immune system, and host phenotype. We suspect that this additional data will initially improve  
573 our ability to make predictions about phenotype, as we have shown in this study. Inspection of  
574 our machine learning models to discover important features enables us to develop hypotheses



575 about causation that can be prioritized for evaluation in future studies, and understanding which  
576 feature types are most useful in predictive models can provide additional clues for  
577 understanding the underlying biology. As our bioinformatics approaches for integrating multi-  
578 omics data continue to improve, and as we continue to amass data relating microbes and  
579 metabolites to the host immune system and phenotype, we will ultimately improve our ability to  
580 model features (such as genital inflammation) based on combinations of microbes and  
581 metabolites. This will enable design of treatments based on an understanding of, for example,  
582 how the presence of a metabolite will impact the abundance of a group of microbes, which in  
583 turn will drive or suppress an immune response.

584

## 585 **Conclusions**

586 There is much work to be done to improve our approaches for integrated multi-omics analyses.  
587 For example, developing machine learning classification tools for microbiome multi-omics data  
588 that can handle multiple observations per subject to make better use of longitudinal data, and  
589 interactive visualization tools that can assist with exploration and interpretation of multi-omics  
590 network data will facilitate work. Combining these approaches with novel methods (44) and  
591 databases (46, 47) for accurate taxonomic classification of vaginal microbiota will further  
592 advance our ability to identify microbial species linked to carcinogenesis and prevention. We  
593 posit that integrated multi-omics approaches are essential to enabling many of the advances in  
594 human medicine that are promised by microbiome research.

595

## 596 **List of abbreviations:**

597 ASV: amplicon sequencing variants

598 AUC: area under the curve

599 BV: bacterial vaginosis

600 CIN: cervical intraepithelial lesion



601 Ctrl: control  
602 CVL: cervicovaginal lavage  
603 HPV: human papillomavirus  
604 HSIL: high grade squamous intraepithelial lesions  
605 ICC: invasive cervical carcinoma  
606 LD: *Lactobacillus* dominance  
607 LSIL: low grade squamous intraepithelial lesions  
608 NHW: non-Hispanic white  
609 NLD: non-*Lactobacillus* dominance

610

#### 611 **Declarations**

#### 612 **Ethics approval and consent to participate**

613 All participants provided informed written consent and all research and related activities  
614 involving human subjects were approved by the Institutional Review Boards at St. Joseph's  
615 Hospital and Medical Center, University of Arizona Cancer Center and Maricopa Integrated  
616 Health Systems, all located in Phoenix, AZ.

617

#### 618 **Consent for publication**

619 Not applicable.

620

#### 621 **Availability of data and materials**

622 Bacterial 16s RNA gene sequence data analyzed in this study were deposited in SRA  
623 (PRJNA518153). Immunoproteome and metabolome data are available online as  
624 supplementary materials accompanying our previous reports (17, 18, 31, 32).

625

#### 626 **Competing interests**

627 Authors declare no competing interests.

628

## 629 **Funding**

630 This study was supported by the Flinn Foundation Grant #1974 to D.M.C. and M.M.H-K., Flinn

631 Foundation Grant #2244 to M.M.H-K. and the National Institutes of Health NCI awards for the

632 Partnership of Native American Cancer Prevention U54CA143924 (UACC) to M.M.H-K and

633 U54CA143925 (NAU) to G.J.C.

634

## 635 **Authors' contributions**

636 M.M.H.-K. and D.M.C conceived and designed the study. D.M.C. participated in the patient

637 recruitment and sample collection. P.Ł. processed the samples and performed the biological

638 assays. N.A.B. performed bioinformatic analyses. N.A.B., P.Ł., G.J.C. and M.M.H-K. analyzed

639 and interpreted the data. P.Ł and N.A.B. drafted the manuscript. M.M.H-K., G.J.C. and D.M.C.

640 critically reviewed the manuscript. All authors read and approved the final version of the paper.

641

## 642 **Acknowledgements**

643 We would like to thank the patients who enrolled in the study and acknowledge Kelli Williamson,

644 Ann De Jong, Eileen Molzen, Liane Fales, Maureen Sutton for the kind assistance in patient

645 recruitment and sample collection and Drs. Dominique Barnes and Alison Goulder for the

646 assistance with clinical sample and data collection.

647

## 648 **Figure legends**

649

650 **Figure 1. Schematic of a multi-omics approach to study the complex interplay between**

651 **HPV, host and microbiota in women across cervical neoplasia.** In this multicenter study

652  $n=100$  women were enrolled with invasive cervical carcinoma (ICC), high- and low-grade

653 squamous intraepithelial lesions (HSIL, LSIL), as well as, HPV-positive and healthy HPV-  
654 negative controls (Ctrl). Vaginal swabs and cervicovaginal lavages (CVL) were collected for  
655 vaginal pH, microbiome, metabolome and immunoproteome analyses. Patient-related metadata,  
656 including age, body mass index (BMI), ethnicity, were also collected through medical records  
657 and surveys. The vaginal microbiota compositions were determined by 16S rRNA gene  
658 sequencing ( $n=99$ ) revealing 849 amplicon sequencing variants (ASVs). Cervicovaginal  
659 metabolic fingerprints were profiled by liquid chromatography-mass spectrometry ( $n=78$ ) and  
660 identified 475 unique metabolites. Levels of immune mediators ( $n=100$ ) and other cancer-  
661 related proteins ( $n=78$ ) in CVL samples (73 targets) were evaluated using multiplex cytometric  
662 bead arrays. Principal component, hierarchical clustering, neural network (mmvec) and Random  
663 Forest analyses were utilized to explore associations among multi-omics data sets to predict  
664 *Lactobacillus* dominance (dominant vs. non-dominant), vaginal pH (low  $\leq 5$  vs. high  $>5$ ),  
665 evidence of genital inflammation (high, low, none) and disease status (Ctrl HPV-, Ctrl HPV+,  
666 LSIL, HSIL, ICC).

667  
668 **Figure 2. Microbiome-metabolome interaction probabilities via mmvec predicts strong**  
669 **associations between lipid metabolites with *Prevotella*, *Streptococcus*, *Atopobium*,**  
670 ***Sneathia* and other clades [MH1] . A.** The principal component analysis (PCA) biplot displays  
671 the top correlations, colored by genus (for microbial features) or by super pathway (for  
672 metabolite features). The correlations were tested using mmvec. This method uses neural  
673 networks for estimating microbe-metabolite interactions through their co-occurrence  
674 probabilities[MH2]. Microbes (points) and metabolites (arrows) that appear closer to each other  
675 in the biplot have a higher likelihood of co-occurring. **B.** The heatmap depicts the correlation  
676 coefficients between ASVs and metabolites; hierarchical clustering was done via average  
677 weighted Bray-Curtis distance. ASVs were determined using the consensus taxonomy (see  
678 Methods section).

679

680 **Figure 3. Metabolites (particularly xenobiotics, carbohydrates, amino acids and**  
681 **peptides) and the inflammatory cytokine MIF can accurately predict *Lactobacillus***  
682 **dominance.** Integrated vaginal metabolome and immunoproteome profiles were used as  
683 predictive features for training cross-validated Random Forest classifiers to predict whether a  
684 subject's vaginal microbiota is *Lactobacillus* dominant (LD  $\geq$  80% relative abundance consists of  
685 *Lactobacillus* ASVs) or non-LD (NLD  $<$  80% relative abundance consists of lactobacilli).  
686 Combined measurements predict the *Lactobacillus* dominance [MH3] at an overall accuracy  
687 rate of 88.9%. A 1.6-fold improvement over baseline accuracy was observed. Receiver  
688 operating characteristics (ROC) analysis showing true and false positive rates for each group,  
689 indicating excellent predictive accuracy for both LD (AUC = 0.94) and NLD groups (AUC = 0.94)  
690 (A). The confusion matrix illustrates the proportion of times each sample receives the correct  
691 classification (B). The graphs depict the 25 most strongly predictive features ranked by relative  
692 importance score, a measure of their contribution to classifier accuracy (C).

693

694 **Figure 4. Metabolites (particularly amino acids, peptides and nucleotides) and**  
695 **inflammatory cytokine MIF are the best predictors of vaginal pH.** Integrated vaginal  
696 microbiome, metabolome, and immunoproteome profiles were used as predictive features for  
697 training cross-validated Random Forest classifiers to predict whether a subject's vaginal pH was  
698 low ( $\leq$  5.0) or high ( $>$  5.0). Combined measurements predict vaginal pH at an overall accuracy  
699 rate of 72.6%. A 1.4-fold improvement over baseline accuracy was observed. Receiver  
700 operating characteristics (ROC) analysis showing true and false positive rates for each group,  
701 indicating weak predictive accuracy (micro-average AUC = 0.70) for both low (AUC = 0.70) and  
702 high pH groups (AUC = 0.70) (A). The confusion matrix illustrates the proportion of times each  
703 sample receives the correct classification (B). The graphs depict the 25 most strongly predictive

704 features ranked by relative importance score, a measure of their contribution to classifier  
705 accuracy (C).

706

707 **Figure 5. Various metabolites (particularly long-chain fatty acids, sphingolipids and**  
708 **glucose), inflammatory cytokines (IL-6, IL-10, MIP-1alpha) and cancer biomarkers (leptin,**  
709 **VEGF) are the best predictors of the genital inflammation.** Integrated vaginal microbiome,  
710 metabolome, and immunoproteome profiles (excluding the 7 cytokines used to score genital  
711 inflammation) were used as predictive features for training cross-validated Random Forest  
712 classifiers to predict whether a subject's genital inflammation score was "no inflammation" (0),  
713 low (1-4), or high ( $\geq 5.0$ ). Combined measurements predict inflammation score at an overall  
714 accuracy rate of 75.3%. A 1.6-fold improvement over baseline accuracy was observed.

715 Receiver operating characteristics (ROC) analysis showing true and false positive rates for each  
716 group, indicating moderate average accuracy (micro-average AUC = 0.88) and weak to good  
717 predictive accuracy for each group (A). The confusion matrix illustrates the proportion of times  
718 each sample receives the correct classification (B). The graphs depict the 25 most strongly  
719 predictive features ranked by relative importance score, a measure of their contribution to  
720 classifier accuracy (C).

721

722 **Figure 6. Integrating multiple -omics datasets does not dramatically improve overall**  
723 **prediction accuracy; however, different integration of various measurements are needed**  
724 **for the best prediction of distinct features.** Graphs show stepwise accuracy levels for  
725 *Lactobacillus* dominance (A), vaginal pH (B) and genital inflammation (C) when random forest  
726 models are trained on a single omics dataset or combined data containing 2-3 omics datasets.  
727 *Lactobacillus* dominance can be explained mostly by metabolome data, vaginal pH by  
728 metabolome and microbiome datasets, and genital inflammation by metabolome and  
729 immunoproteome datasets. Combining omics datasets leads to slightly higher average accuracy

730 scores for *Lactobacillus* dominance and vaginal pH classification, but no effect on genital  
731 inflammation classification.

732

### 733 **References**

- 734 1. Arbyn M, Weiderpass E, Bruni L, de Sanjose S, Saraiya M, Ferlay J, et al. Estimates of  
735 incidence and mortality of cervical cancer in 2018: a worldwide analysis. *Lancet Glob Health*.  
736 2020;8(2):e191-e203.
- 737 2. Schiffman M, Castle PE, Jeronimo J, Rodriguez AC, Wacholder S. Human  
738 papillomavirus and cervical cancer. *Lancet*. 2007;370(9590):890-907.
- 739 3. Gravitt PE, Winer RL. Natural history of HPV infection across the lifespan: role of viral  
740 latency. *Viruses*. 2017;9(10).
- 741 4. Łaniewski P, Ilhan ZE, Herbst-Kralovetz MM. The microbiome and gynaecological  
742 cancer development, prevention and therapy. *Nat Rev Urol*. 2020;17(4):232-50.
- 743 5. Berg G, Rybakova D, Fischer D, Cernava T, Verges MC, Charles T, et al. Microbiome  
744 definition re-visited: old concepts and new challenges. *Microbiome*. 2020;8(1):103.
- 745 6. Integrative HMPRNC. The Integrative Human Microbiome Project. *Nature*.  
746 2019;569(7758):641-8.
- 747 7. Ravel J, Gajer P, Abdo Z, Schneider GM, Koenig SS, McCulle SL, et al. Vaginal  
748 microbiome of reproductive-age women. *Proc Natl Acad Sci U S A*. 2011;108 Suppl 1:4680-7.
- 749 8. Anahtar MN, Gootenberg DB, Mitchell CM, Kwon DS. Cervicovaginal microbiota and  
750 reproductive health: The virtue of simplicity. *Cell host & microbe*. 2018;23(2):159-68.
- 751 9. Martin DH, Marrazzo JM. The vaginal microbiome: Current understanding and future  
752 directions. *J Infect Dis*. 2016;214 Suppl 1:S36-41.
- 753 10. Onderdonk AB, Delaney ML, Fichorova RN. The human microbiome during bacterial  
754 vaginosis. *Clin Microbiol Rev*. 2016;29(2):223-38.
- 755 11. Hillier SL, Marrazzo J, Holmes KK. Bacterial Vaginosis. In: Holmes KK, Sparling PF,  
756 Stamm WE, Piot P, Wasserheit JN, Corey L, et al., editors. *Sexually Transmitted Diseases*,  
757 Fourth Edition: McGraw-Hill Education; 2007. p. 737-68.
- 758 12. Lee JE, Lee S, Lee H, Song YM, Lee K, Han MJ, et al. Association of the vaginal  
759 microbiota with human papillomavirus infection in a Korean twin cohort. *PLoS One*.  
760 2013;8(5):e63514.
- 761 13. Chen Y, Hong Z, Wang W, Gu L, Gao H, Qiu L, et al. Association between the vaginal  
762 microbiome and high-risk human papillomavirus infection in pregnant Chinese women. *BMC*  
763 *Infect Dis*. 2019;19(1):677.
- 764 14. Gao W, Weng J, Gao Y, Chen X. Comparison of the vaginal microbiota diversity of  
765 women with and without human papillomavirus infection: a cross-sectional study. *BMC Infect*  
766 *Dis*. 2013;13:271.
- 767 15. Tuominen H, Rautava S, Syrjanen S, Collado MC, Rautava J. HPV infection and  
768 bacterial microbiota in the placenta, uterine cervix and oral mucosa. *Sci Rep*. 2018;8(1):9787.
- 769 16. Mitra A, MacIntyre DA, Lee YS, Smith A, Marchesi JR, Lehne B, et al. Cervical  
770 intraepithelial neoplasia disease progression is associated with increased vaginal microbiome  
771 diversity. *Sci Rep*. 2015;5:16865.
- 772 17. Łaniewski P, Barnes D, Goulder A, Cui H, Roe DJ, Chase DM, et al. Linking  
773 cervicovaginal immune signatures, HPV and microbiota composition in cervical carcinogenesis  
774 in non-Hispanic and Hispanic women. *Sci Rep*. 2018;8(1):7593.

- 775 18. Audirac-Chalifour A, Torres-Poveda K, Bahena-Roman M, Tellez-Sosa J, Martinez-  
776 Barnette J, Cortina-Ceballos B, et al. Cervical microbiome and cytokine profile at various  
777 stages of cervical cancer: a pilot study. *PLoS One*. 2016;11(4):e0153274.
- 778 19. Oh HY, Kim BS, Seo SS, Kong JS, Lee JK, Park SY, et al. The association of uterine  
779 cervical microbiota with an increased risk for cervical intraepithelial neoplasia in Korea. *Clin*  
780 *Microbiol Infect*. 2015;21(7):674 e1-9.
- 781 20. Kwasniewski W, Wolun-Cholewa M, Kotarski J, Warchol W, Kuzma D, Kwasniewska A,  
782 et al. Microbiota dysbiosis is associated with HPV-induced cervical carcinogenesis. *Oncol Lett*.  
783 2018;16(6):7035-47.
- 784 21. Godoy-Vitorino F, Romaguera J, Zhao C, Vargas-Robles D, Ortiz-Morales G, Vazquez-  
785 Sanchez F, et al. Cervicovaginal fungi and bacteria associated with cervical intraepithelial  
786 neoplasia and high-risk human papillomavirus infections in a Hispanic population. *Front*  
787 *Microbiol*. 2018;9:2533.
- 788 22. Brotman RM, Shardell MD, Gajer P, Tracy JK, Zenilman JM, Ravel J, et al. Interplay  
789 between the temporal dynamics of the vaginal microbiota and human papillomavirus detection.  
790 *J Infect Dis*. 2014;210(11):1723-33.
- 791 23. Di Paola M, Sani C, Clemente AM, Iossa A, Perissi E, Castronovo G, et al.  
792 Characterization of cervico-vaginal microbiota in women developing persistent high-risk Human  
793 Papillomavirus infection. *Sci Rep*. 2017;7(1):10200.
- 794 24. Mitra A, MacIntyre DA, Ntrisos G, Smith A, Tsilidis KK, Marchesi JR, et al. The vaginal  
795 microbiota associates with the regression of untreated cervical intraepithelial neoplasia 2  
796 lesions. *Nat Commun*. 2020;11(1):1999.
- 797 25. Usyk M, Zolnik CP, Castle PE, Porras C, Herrero R, Gradissimo A, et al. Cervicovaginal  
798 microbiome and natural history of HPV in a longitudinal study. *PLoS Pathog*.  
799 2020;16(3):e1008376.
- 800 26. Norenhag J, Du J, Olovsson M, Verstraelen H, Engstrand L, Brusselaers N. The vaginal  
801 microbiota, human papillomavirus and cervical dysplasia: a systematic review and network  
802 meta-analysis. *BJOG*. 2020;127(2):171-80.
- 803 27. Wang H, Ma Y, Li R, Chen X, Wan L, Zhao W. Associations of cervicovaginal lactobacilli  
804 with high-risk HPV infection, cervical intraepithelial neoplasia, and cancer: a systematic review  
805 and meta-analysis. *J Infect Dis*. 2019.
- 806 28. Brusselaers N, Shrestha S, Van De Wijgert J, Verstraelen H. Vaginal dysbiosis, and the  
807 risk of human papillomavirus and cervical cancer: systematic review and meta-analysis. *Am J*  
808 *Obstet Gynecol*. 2018.
- 809 29. Ilhan ZE, Łaniewski P, Thomas N, Roe DJ, Chase DM, Herbst-Kralovetz MM.  
810 Deciphering the complex interplay between microbiota, HPV, inflammation and cancer through  
811 cervicovaginal metabolic profiling. *EBioMedicine*. 2019;44:675-90.
- 812 30. Borgogna JC, Shardell MD, Santori EK, Nelson TM, Rath JM, Glover ED, et al. The  
813 vaginal metabolome and microbiota of cervical HPV-positive and HPV-negative women: a  
814 cross-sectional analysis. *BJOG*. 2020;127(2):182-92.
- 815 31. Łaniewski P, Cui H, Roe DJ, Barnes D, Goulder A, Monk BJ, et al. Features of the  
816 cervicovaginal microenvironment drive cancer biomarker signatures in patients across cervical  
817 carcinogenesis. *Sci Rep*. 2019;9(1):7333.
- 818 32. Łaniewski P, Cui H, Roe DJ, Chase DM, Herbst-Kralovetz MM. Vaginal microbiota,  
819 genital inflammation and neoplasia impact immune checkpoint protein profiles in the  
820 cervicovaginal microenvironment. *NPJ Precis Oncol*. 2020.
- 821 33. Watts DH, Fazzari M, Minkoff H, Hillier SL, Sha B, Glesby M, et al. Effects of bacterial  
822 vaginosis and other genital infections on the natural history of human papillomavirus infection in  
823 HIV-1-infected and high-risk HIV-1-uninfected women. *J Infect Dis*. 2005;191(7):1129-39.



- 824 34. Gillet E, Meys JF, Verstraelen H, Bosire C, De Sutter P, Temmerman M, et al. Bacterial  
825 vaginosis is associated with uterine cervical human papillomavirus infection: a meta-analysis.  
826 *BMC Infect Dis.* 2011;11:10.
- 827 35. Guo YL, You K, Qiao J, Zhao YM, Geng L. Bacterial vaginosis is conducive to the  
828 persistence of HPV infection. *Int J STD AIDS.* 2012;23(8):581-4.
- 829 36. Srinivasan S, Morgan MT, Fiedler TL, Djukovic D, Hoffman NG, Raftery D, et al.  
830 Metabolic signatures of bacterial vaginosis. *MBio.* 2015;6(2).
- 831 37. Maceyka M, Spiegel S. Sphingolipid metabolites in inflammatory disease. *Nature.*  
832 2014;510(7503):58-67.
- 833 38. Westrich JA, Warren CJ, Pyeon D. Evasion of host immune defenses by human  
834 papillomavirus. *Virus Res.* 2017;231:21-33.
- 835 39. Morton JT, Aksenov AA, Nothias LF, Foulds JR, Quinn RA, Badri MH, et al. Learning  
836 representations of microbe-metabolite interactions. *Nat Methods.* 2019;16(12):1306-14.
- 837 40. Bolyen E, Rideout JR, Dillon MR, Bokulich NA, Abnet CC, Al-Ghalith GA, et al.  
838 Reproducible, interactive, scalable and extensible microbiome data science using QIIME 2. *Nat*  
839 *Biotechnol.* 2019;37(8):852-7.
- 840 41. Callahan BJ, McMurdie PJ, Rosen MJ, Han AW, Johnson AJ, Holmes SP. DADA2:  
841 High-resolution sample inference from Illumina amplicon data. *Nat Methods.* 2016;13(7):581-3.
- 842 42. Bokulich NA, Kaehler BD, Rideout JR, Dillon M, Bolyen E, Knight R, et al. Optimizing  
843 taxonomic classification of marker-gene amplicon sequences with QIIME 2's q2-feature-  
844 classifier plugin. *Microbiome.* 2018;6(1):90.
- 845 43. McDonald D, Price MN, Goodrich J, Nawrocki EP, DeSantis TZ, Probst A, et al. An  
846 improved Greengenes taxonomy with explicit ranks for ecological and evolutionary analyses of  
847 bacteria and archaea. *ISME J.* 2012;6(3):610-8.
- 848 44. Kaehler BD, Bokulich NA, McDonald D, Knight R, Caporaso JG, Huttley GA. Species  
849 abundance information improves sequence taxonomy classification accuracy. *Nat Commun.*  
850 2019;10(1):4643.
- 851 45. Parks DH, Chuvochina M, Waite DW, Rinke C, Skarshewski A, Chaumeil PA, et al. A  
852 standardized bacterial taxonomy based on genome phylogeny substantially revises the tree of  
853 life. *Nat Biotechnol.* 2018;36(10):996-1004.
- 854 46. Fettweis JM, Serrano MG, Sheth NU, Mayer CM, Glascock AL, Brooks JP, et al.  
855 Species-level classification of the vaginal microbiome. *BMC Genomics.* 2012;13 Suppl 8:S17.
- 856 47. Nicholas Bokulich, Mike Robeson, Ben Kaehler, & Matthew Dillon. bokulich-  
857 lab/RESCRIPt. Zenodo. <http://doi.org/10.5281/zenodo.3891931>
- 858 48. Bokulich NA, Dillon MR, Bolyen E, Kaehler BD, Huttley GA, Caporaso JG. q2-sample-  
859 classifier: machine-learning tools for microbiome classification and regression. *J Open Res*  
860 *Softw.* 2018;3(30).
- 861 49. Pedregosa F, Varoquaux G, Gramfort A, Michel V, Thirion B, Grisel O, et al. Scikit-learn:  
862 Machine learning in Python. *J Mach Learn Res.* 2011;12:2825-30.
- 863 50. Shannon B, Yi TJ, Perusini S, Gajer P, Ma B, Humphrys MS, et al. Association of HPV  
864 infection and clearance with cervicovaginal immunology and the vaginal microbiota. *Mucosal*  
865 *Immunol.* 2017;10(5):1310-9.
- 866 51. Castle PE, Hillier SL, Rabe LK, Hildesheim A, Herrero R, Bratti MC, et al. An association  
867 of cervical inflammation with high-grade cervical neoplasia in women infected with oncogenic  
868 human papillomavirus (HPV). *Cancer Epidemiol Biomarkers Prev.* 2001;10(10):1021-7.
- 869 52. Mhatre M, McAndrew T, Carpenter C, Burk RD, Einstein MH, Herold BC. Cervical  
870 intraepithelial neoplasia is associated with genital tract mucosal inflammation. *Sex Transm Dis.*  
871 2012;39(8):591-7.
- 872 53. Kriek JM, Jaumdally SZ, Masson L, Little F, Mbulawa Z, Gumbi PP, et al. Female genital  
873 tract inflammation, HIV co-infection and persistent mucosal Human Papillomavirus (HPV)  
874 infections. *Virology.* 2016;493:247-54.



- 875 54. Drolet M, Benard E, Perez N, Brisson M, Group HPVVIS. Population-level impact and  
876 herd effects following the introduction of human papillomavirus vaccination programmes:  
877 updated systematic review and meta-analysis. *Lancet*. 2019;394(10197):497-509.
- 878 55. Nelson TM, Borgogna JC, Michalek RD, Roberts DW, Rath JM, Glover ED, et al.  
879 Cigarette smoking is associated with an altered vaginal tract metabolomic profile. *Sci Rep*.  
880 2018;8(1):852.
- 881 56. Masson L, Arnold KB, Little F, Mlisana K, Lewis DA, Mkhize N, et al. Inflammatory  
882 cytokine biomarkers to identify women with asymptomatic sexually transmitted infections and  
883 bacterial vaginosis who are at high risk of HIV infection. *Sex Transm Infect*. 2016;92(3):186-93.
- 884 57. Lennard K, Dabee S, Barnabas SL, Havyarimana E, Blakney A, Jaumdally SZ, et al.  
885 Microbial composition predicts genital tract inflammation and persistent bacterial vaginosis in  
886 South African adolescent females. *Infect Immun*. 2018;86(1).
- 887 58. Gomez-Larrauri A, Presa N, Dominguez-Herrera A, Ouro A, Trueba M, Gomez-Munoz  
888 A. Role of bioactive sphingolipids in physiology and pathology. *Essays Biochem*. 2020.
- 889 59. Gajer P, Brotman RM, Bai G, Sakamoto J, Schutte UM, Zhong X, et al. Temporal  
890 dynamics of the human vaginal microbiota. *Sci Transl Med*. 2012;4(132):132ra52.
- 891 60. Witkin SS, Mendes-Soares H, Linhares IM, Jayaram A, Ledger WJ, Forney LJ. Influence  
892 of vaginal bacteria and D- and L-lactic acid isomers on vaginal extracellular matrix  
893 metalloproteinase inducer: implications for protection against upper genital tract infections.  
894 *MBio*. 2013;4(4).
- 895 61. Edwards VL, Smith SB, McComb EJ, Tamarelle J, Ma B, Humphrys MS, et al. The  
896 cervicovaginal microbiota-host interaction modulates *Chlamydia trachomatis* infection. *mBio*.  
897 2019;10(4).
- 898 62. Petrova MI, Reid G, Vaneechoutte M, Lebeer S. *Lactobacillus iners*: Friend or Foe?  
899 *Trends Microbiol*. 2017;25(3):182-91.
- 900 63. Troisi J, Sarno L, Landolfi A, Scala G, Martinelli P, Venturella R, et al. Metabolomic  
901 Signature of Endometrial Cancer. *J Proteome Res*. 2018;17(2):804-12.
- 902 64. Vettukattil R, Hetland TE, Florenes VA, Kaern J, Davidson B, Bathen TF. Proton  
903 magnetic resonance metabolomic characterization of ovarian serous carcinoma effusions:  
904 chemotherapy-related effects and comparison with malignant mesothelioma and breast  
905 carcinoma. *Hum Pathol*. 2013;44(9):1859-66.
- 906 65. Hilvo M, de Santiago I, Gopalacharyulu P, Schmitt WD, Budczies J, Kuhberg M, et al.  
907 Accumulated Metabolites of Hydroxybutyric Acid Serve as Diagnostic and Prognostic  
908 Biomarkers of Ovarian High-Grade Serous Carcinomas. *Cancer Res*. 2016;76(4):796-804.
- 909 66. Youm YH, Nguyen KY, Grant RW, Goldberg EL, Bodogai M, Kim D, et al. The ketone  
910 metabolite beta-hydroxybutyrate blocks NLRP3 inflammasome-mediated inflammatory disease.  
911 *Nat Med*. 2015;21(3):263-9.
- 912 67. Moossavi M, Parsamanesh N, Bahrami A, Atkin SL, Sahebkar A. Role of the NLRP3  
913 inflammasome in cancer. *Mol Cancer*. 2018;17(1):158.
- 914 68. Kovachev S. Defence factors of vaginal lactobacilli. *Crit Rev Microbiol*. 2018;44(1):31-9.
- 915 69. McGroarty JA, Tomczek L, Pond DG, Reid G, Bruce AW. Hydrogen peroxide  
916 production by *Lactobacillus* species: correlation with susceptibility to the spermicidal compound  
917 nonoxynol-9. *J Infect Dis*. 1992;165(6):1142-4.
- 918 70. Hertelendy J, Reumuth G, Simons D, Stoppe C, Kim BS, Stromps JP, et al. Macrophage  
919 migration inhibitory factor - a favorable marker in inflammatory diseases? *Curr Med Chem*.  
920 2018;25(5):601-5.
- 921 71. Campisciano G, Zanotta N, Licastro D, De Seta F, Comar M. In vivo microbiome and  
922 associated immune markers: New insights into the pathogenesis of vaginal dysbiosis. *Sci Rep*.  
923 2018;8(1):2307.

- 924 72. Dabee S, Barnabas SL, Lennard KS, Jaumdally SZ, Gamiieldien H, Balle C, et al.  
925 Defining characteristics of genital health in South African adolescent girls and young women at  
926 high risk for HIV infection. *PLoS One*. 2019;14(4):e0213975.
- 927 73. Cheng RJ, Deng WG, Niu CB, Li YY, Fu Y. Expression of macrophage migration  
928 inhibitory factor and CD74 in cervical squamous cell carcinoma. *Int J Gynecol Cancer*.  
929 2011;21(6):1004-12.
- 930 74. Guo P, Wang J, Liu J, Xia M, Li W, He M. Macrophage immigration inhibitory factor  
931 promotes cell proliferation and inhibits apoptosis of cervical adenocarcinoma. *Tumour Biol*.  
932 2015;36(7):5095-102.
- 933 75. Krockenberger M, Engel JB, Kolb J, Dombrowsky Y, Hausler SF, Kohrenhagen N, et al.  
934 Macrophage migration inhibitory factor expression in cervical cancer. *J Cancer Res Clin Oncol*.  
935 2010;136(5):651-7.
- 936 76. Anahtar MN, Byrne EH, Doherty KE, Bowman BA, Yamamoto HS, Soumillon M, et al.  
937 Cervicovaginal bacteria are a major modulator of host inflammatory responses in the female  
938 genital tract. *Immunity*. 2015;42(5):965-76.
- 939 77. Balkwill F. Tumour necrosis factor and cancer. *Nat Rev Cancer*. 2009;9(5):361-71.
- 940 78. Doerflinger SY, Throop AL, Herbst-Kralovetz MM. Bacteria in the vaginal microbiome  
941 alter the innate immune response and barrier properties of the human vaginal epithelia in a  
942 species-specific manner. *J Infect Dis*. 2014;209(12):1989-99.
- 943 79. Gardner JK, Laniewski P, Knight A, Haddad LB, Swaims-Kohlmeier A, Herbst-Kralovetz  
944 MM. Interleukin-36gamma is elevated in cervicovaginal epithelial cells in women with bacterial  
945 vaginosis and in vitro after infection with microbes associated with bacterial vaginosis. *J Infect*  
946 *Dis*. 2020;221(6):983-8.
- 947 80. Ilhan ZE, Łaniewski P, Tonachio A, Herbst-Kralovetz MM. Members of *Prevotella* genus  
948 distinctively modulate innate immune and barrier functions in a human three-dimensional  
949 endometrial epithelial cell model. *J Infect Dis*. 2020:accepted for publication.
- 950

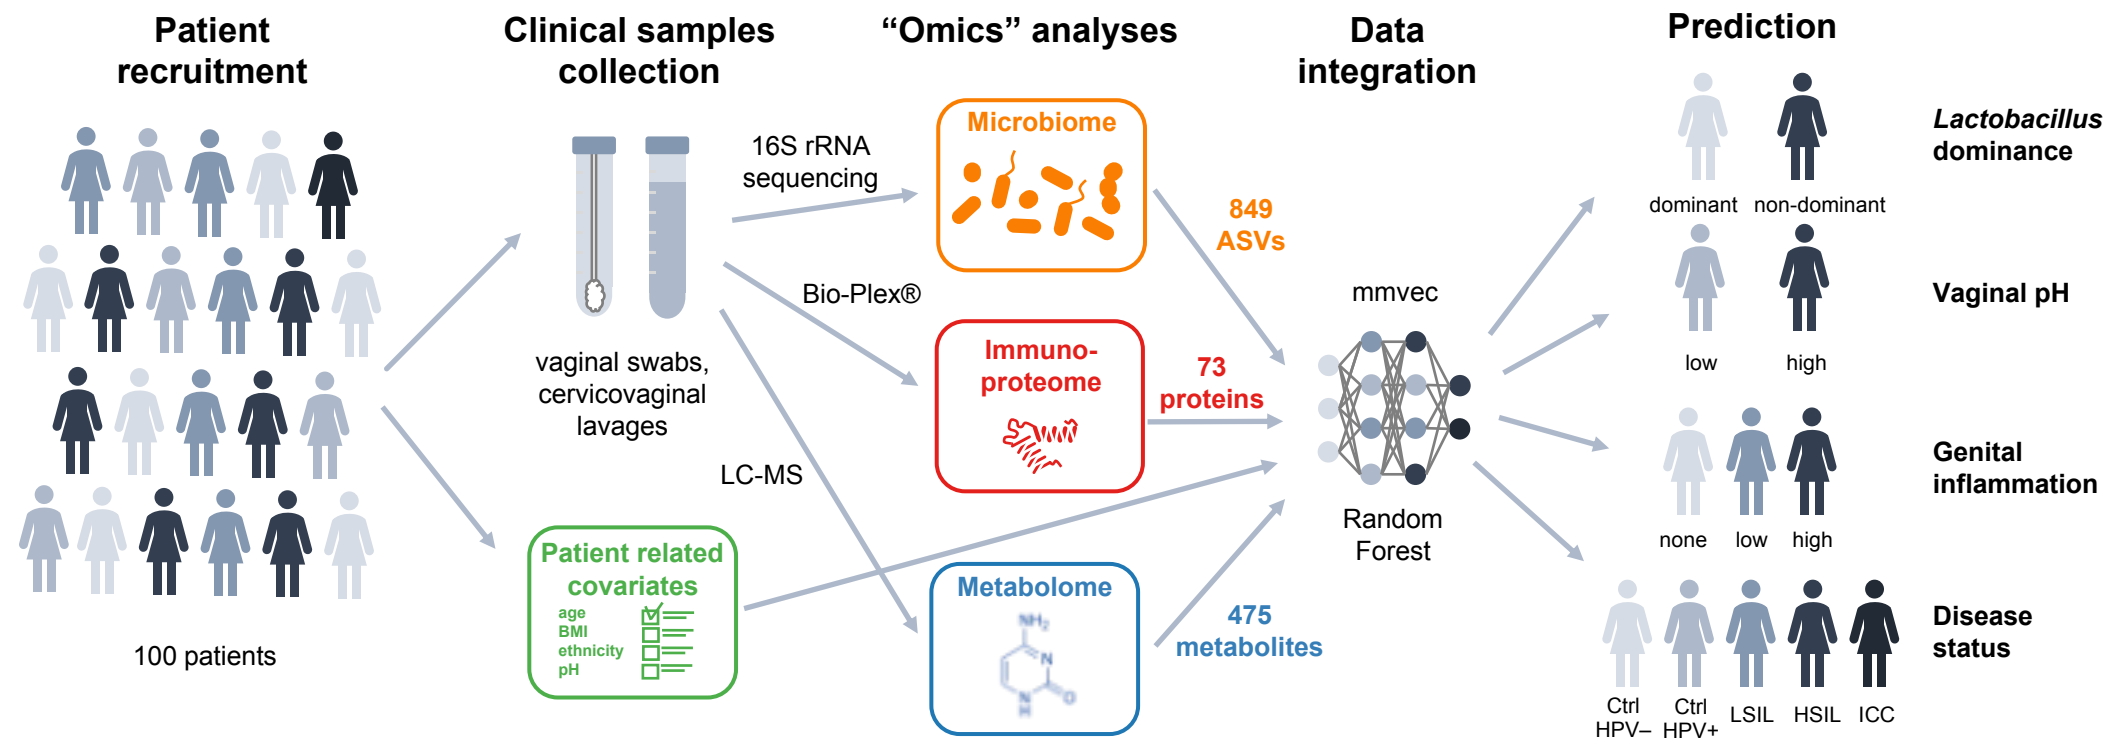

Fig. 1

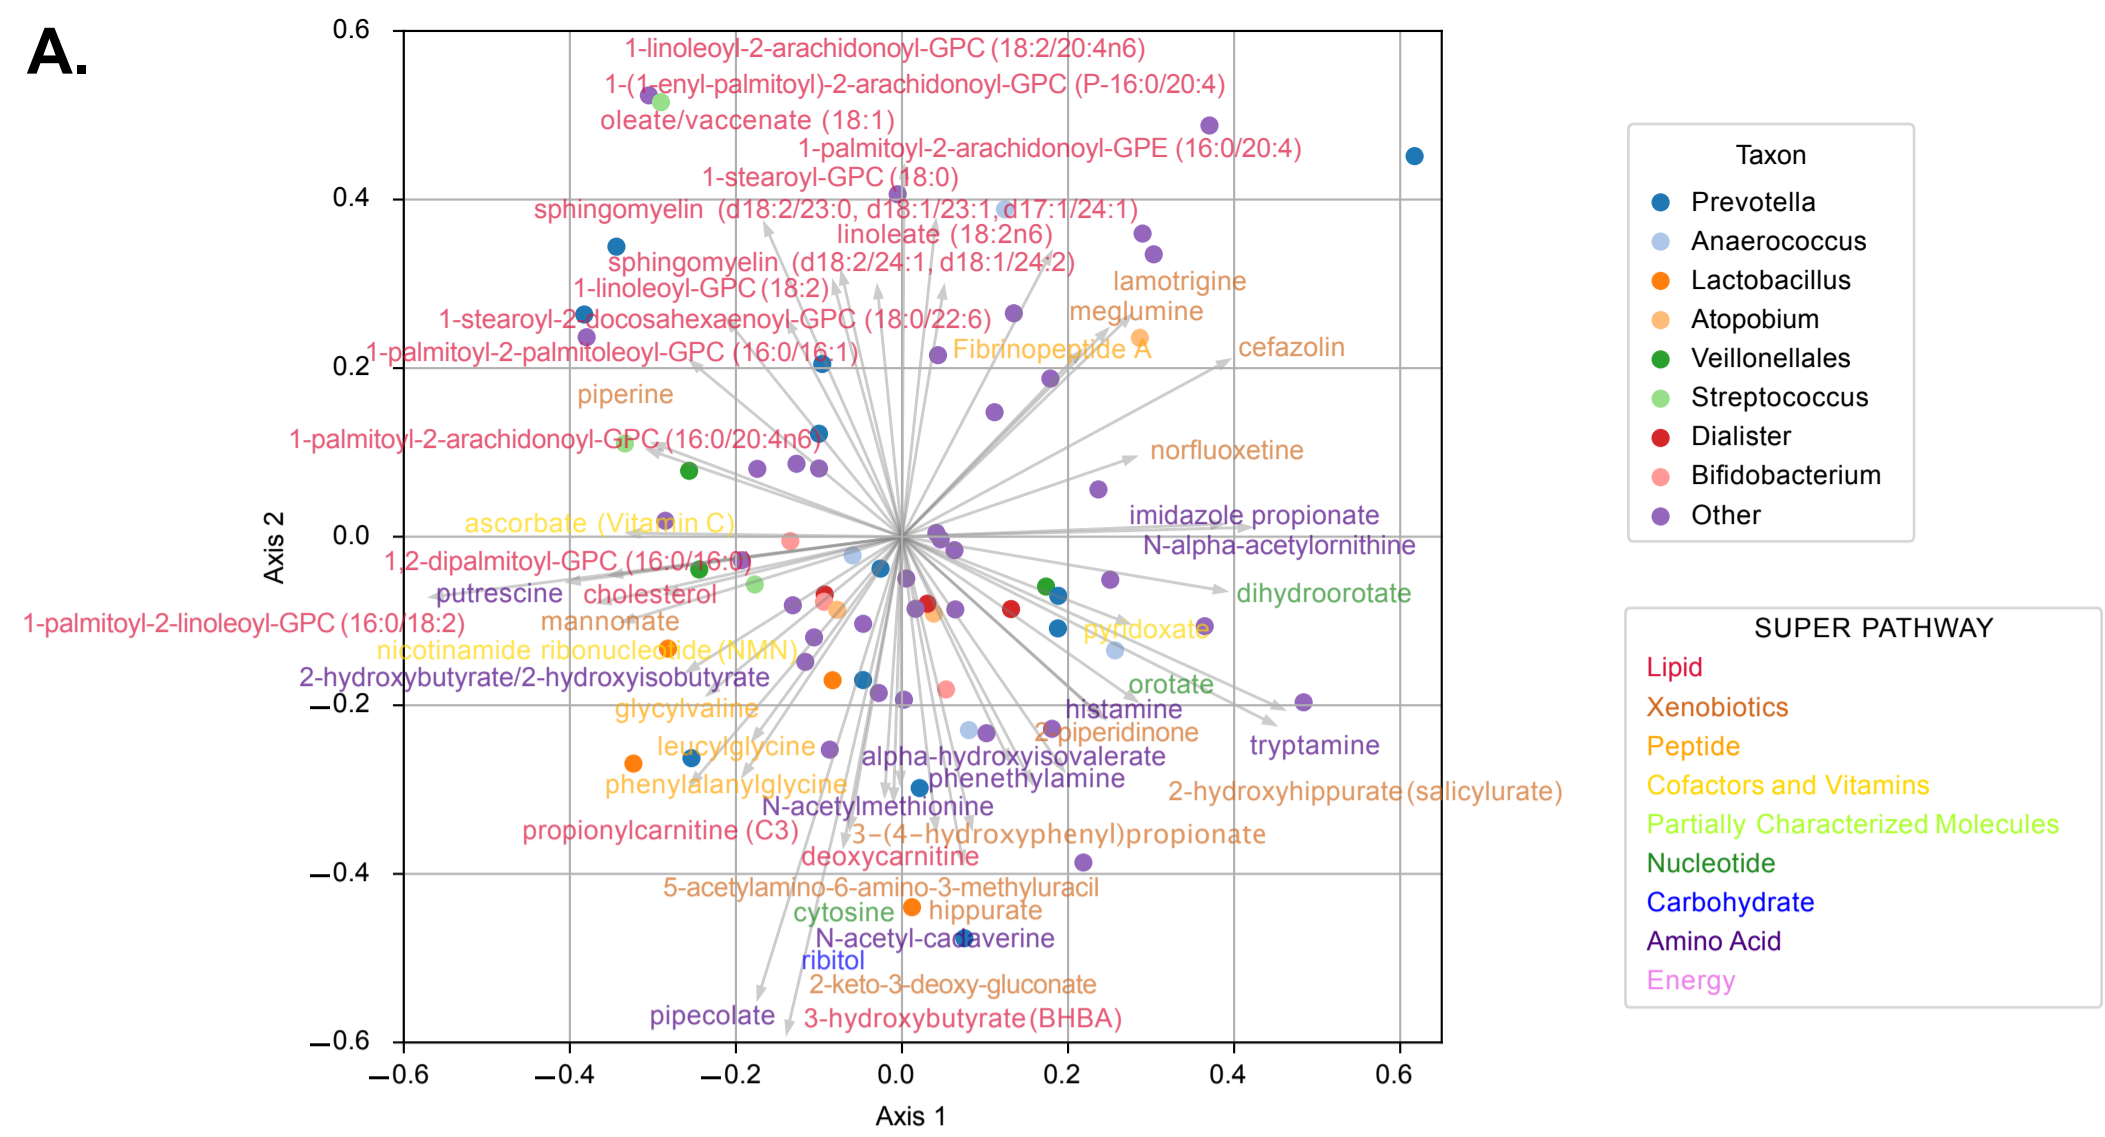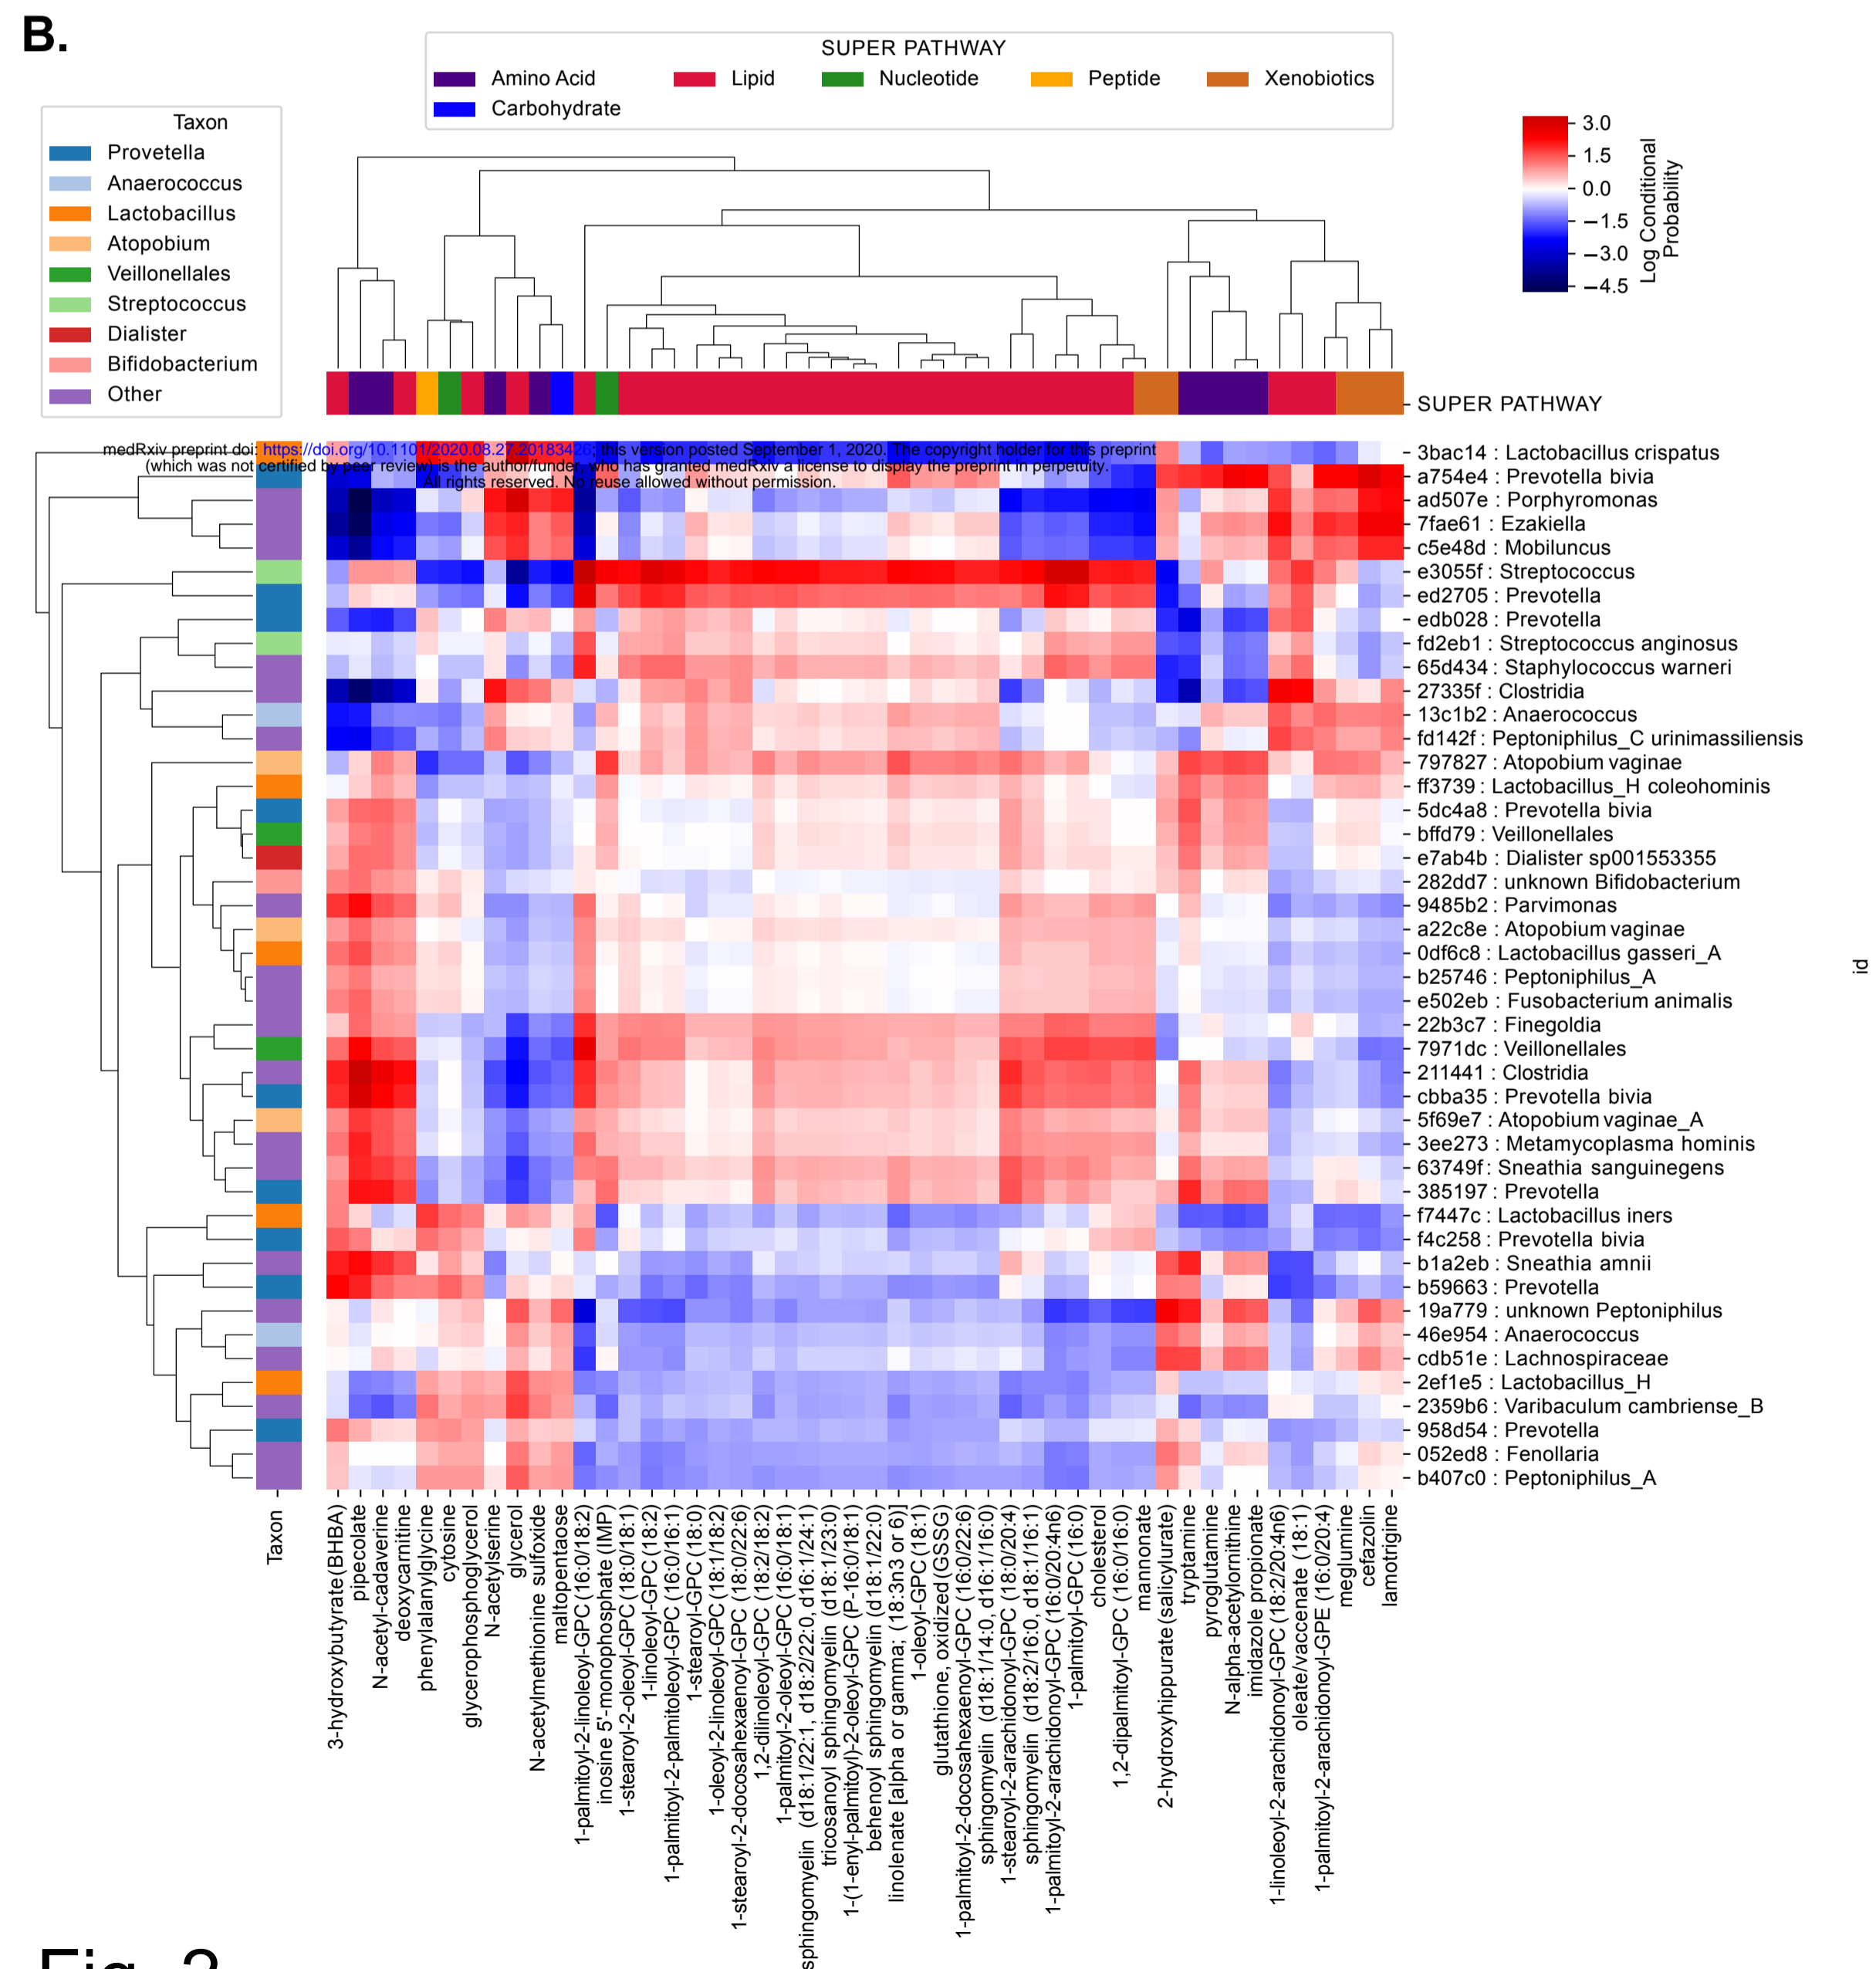

**Fig. 2**

# Lactobacillus dominance

## A. Receiver operating characteristics

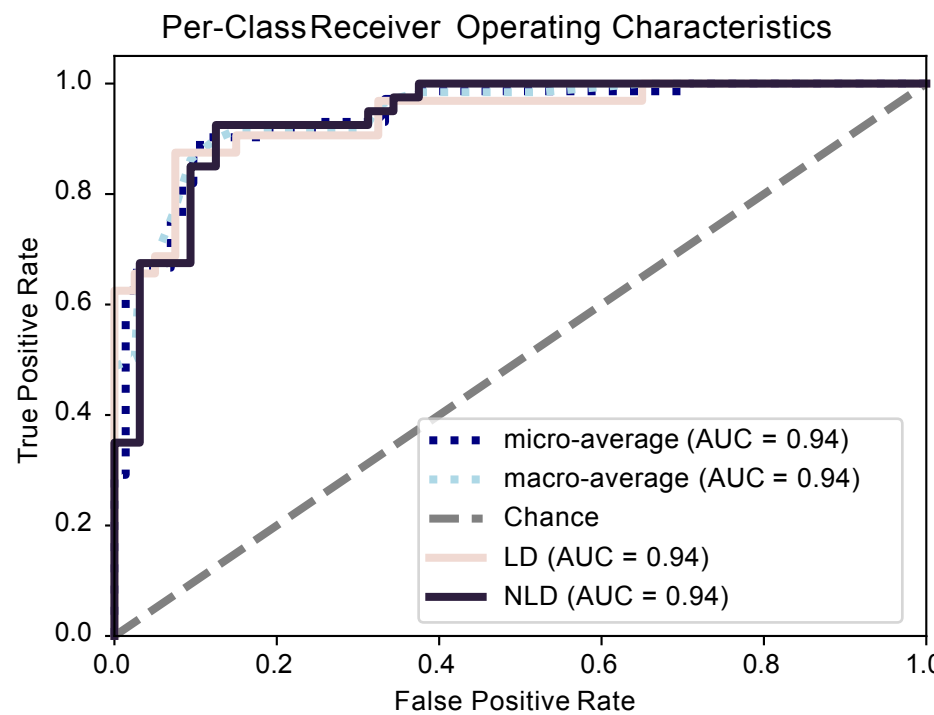

## B. Confusion matrix

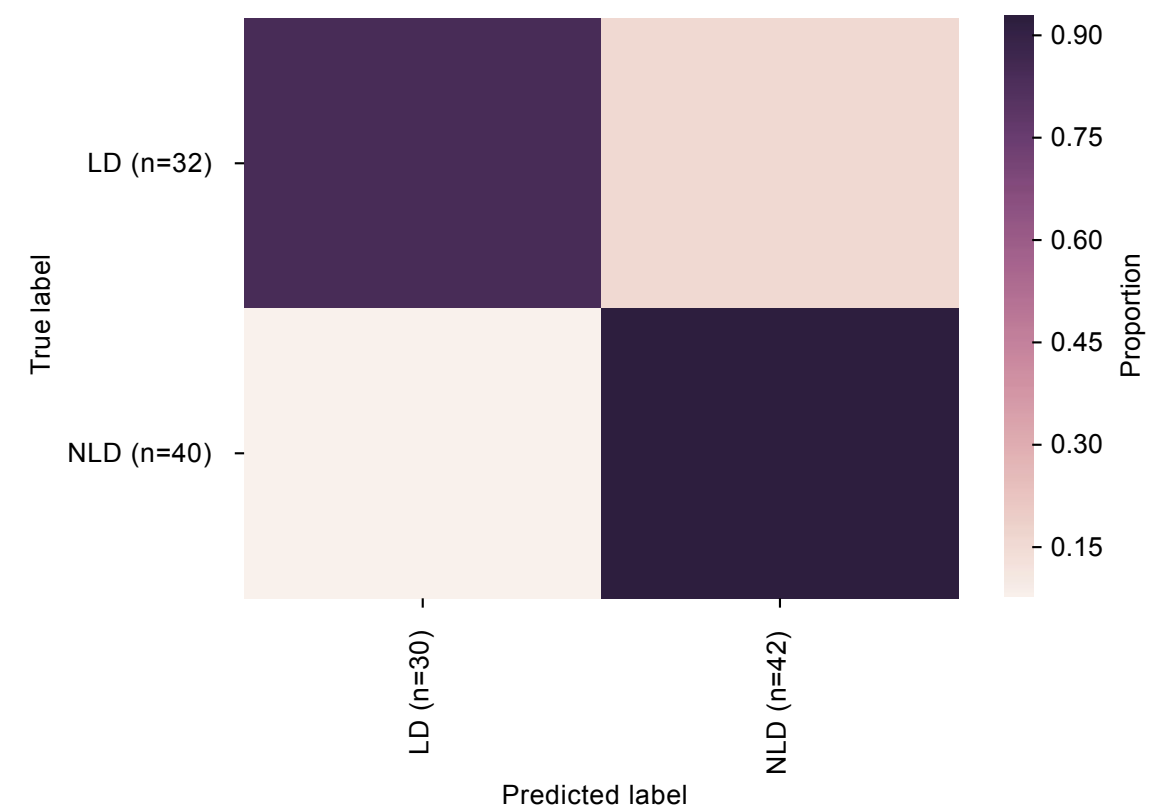

## C. Most predictive features

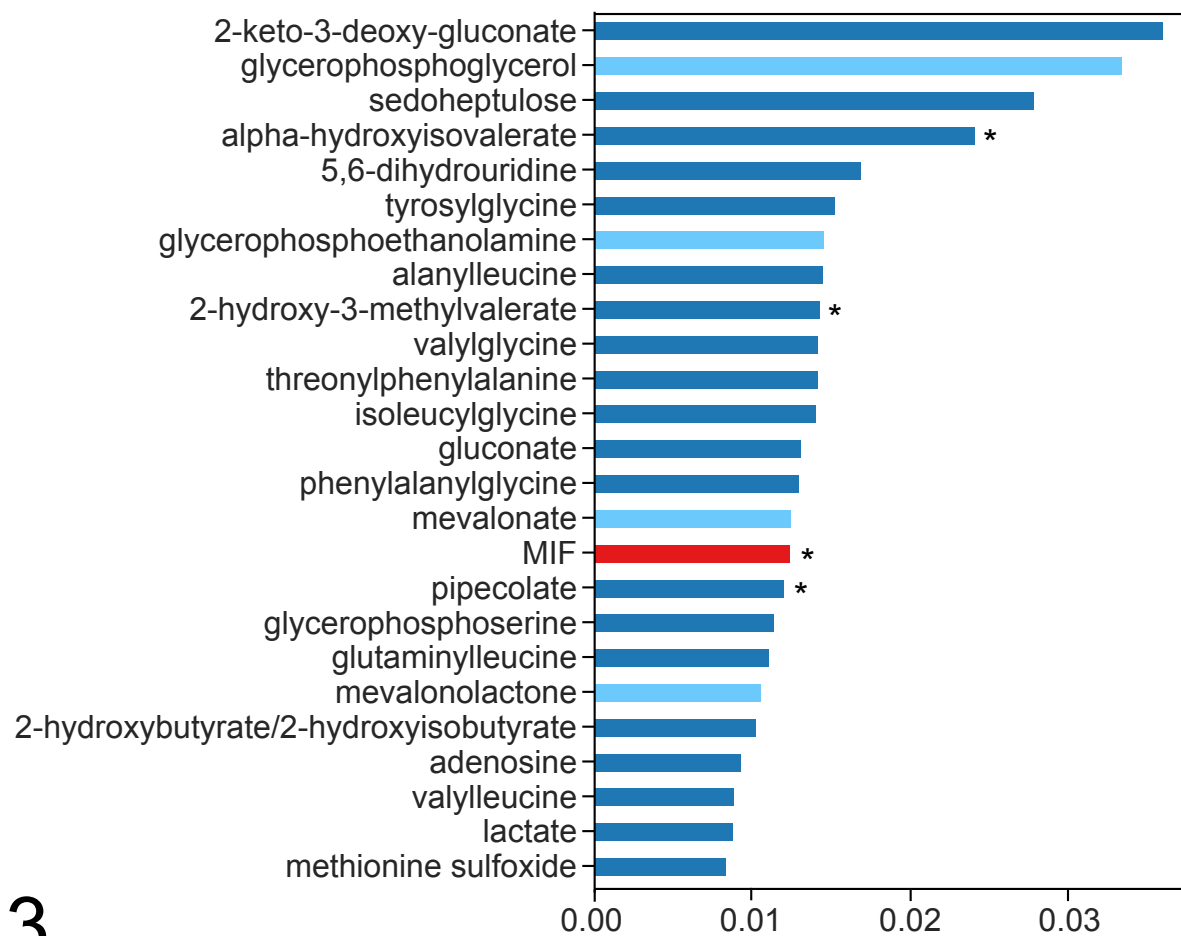

### Metabolic signatures

- lipids
- other metabolites

### Immunoproteomic signatures

- immune mediators, cancer biomarkers

\* elevated in NLD group; otherwise reduced

Fig. 3

# Vaginal pH

## A. Receiver operating characteristics

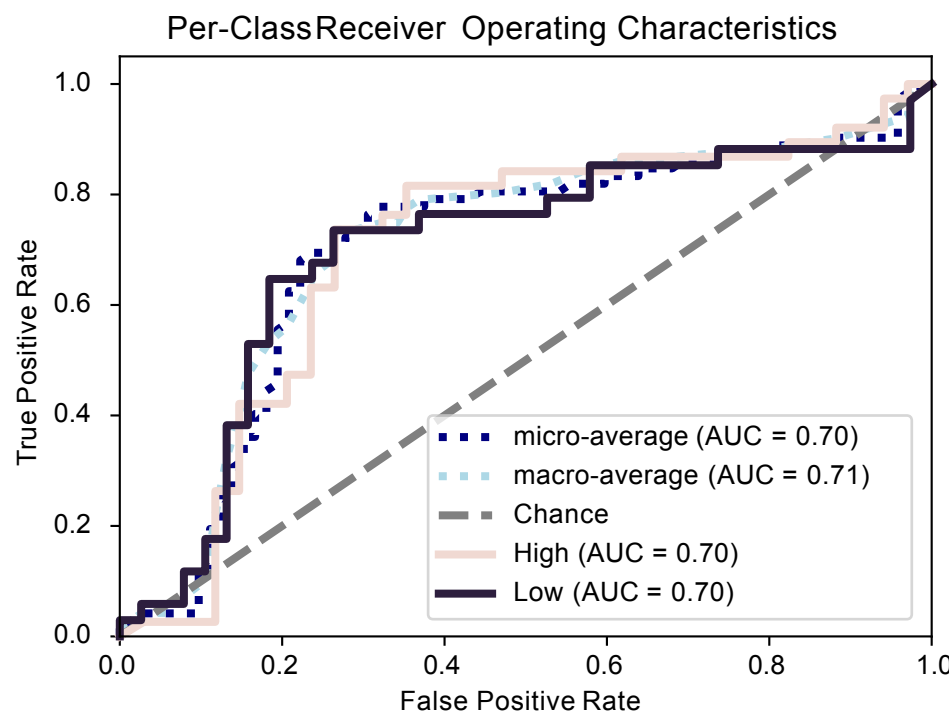

## B. Confusion matrix

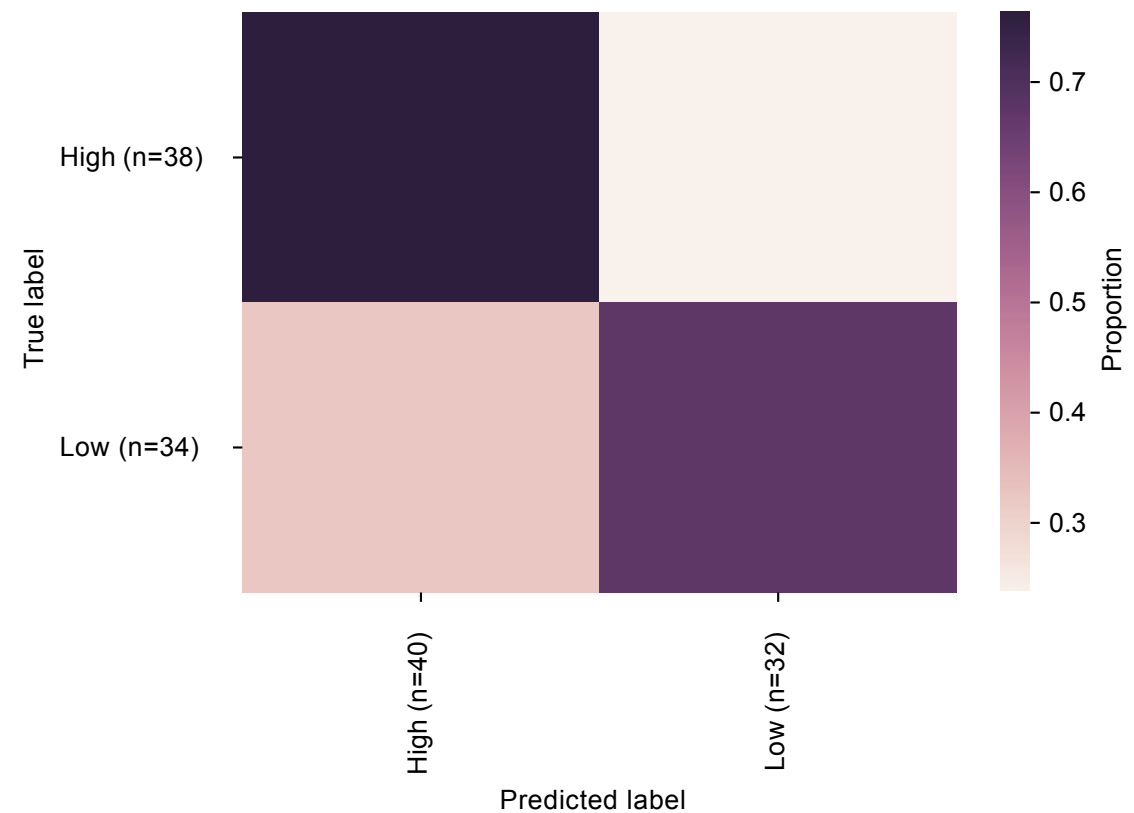

## C. Most predictive features

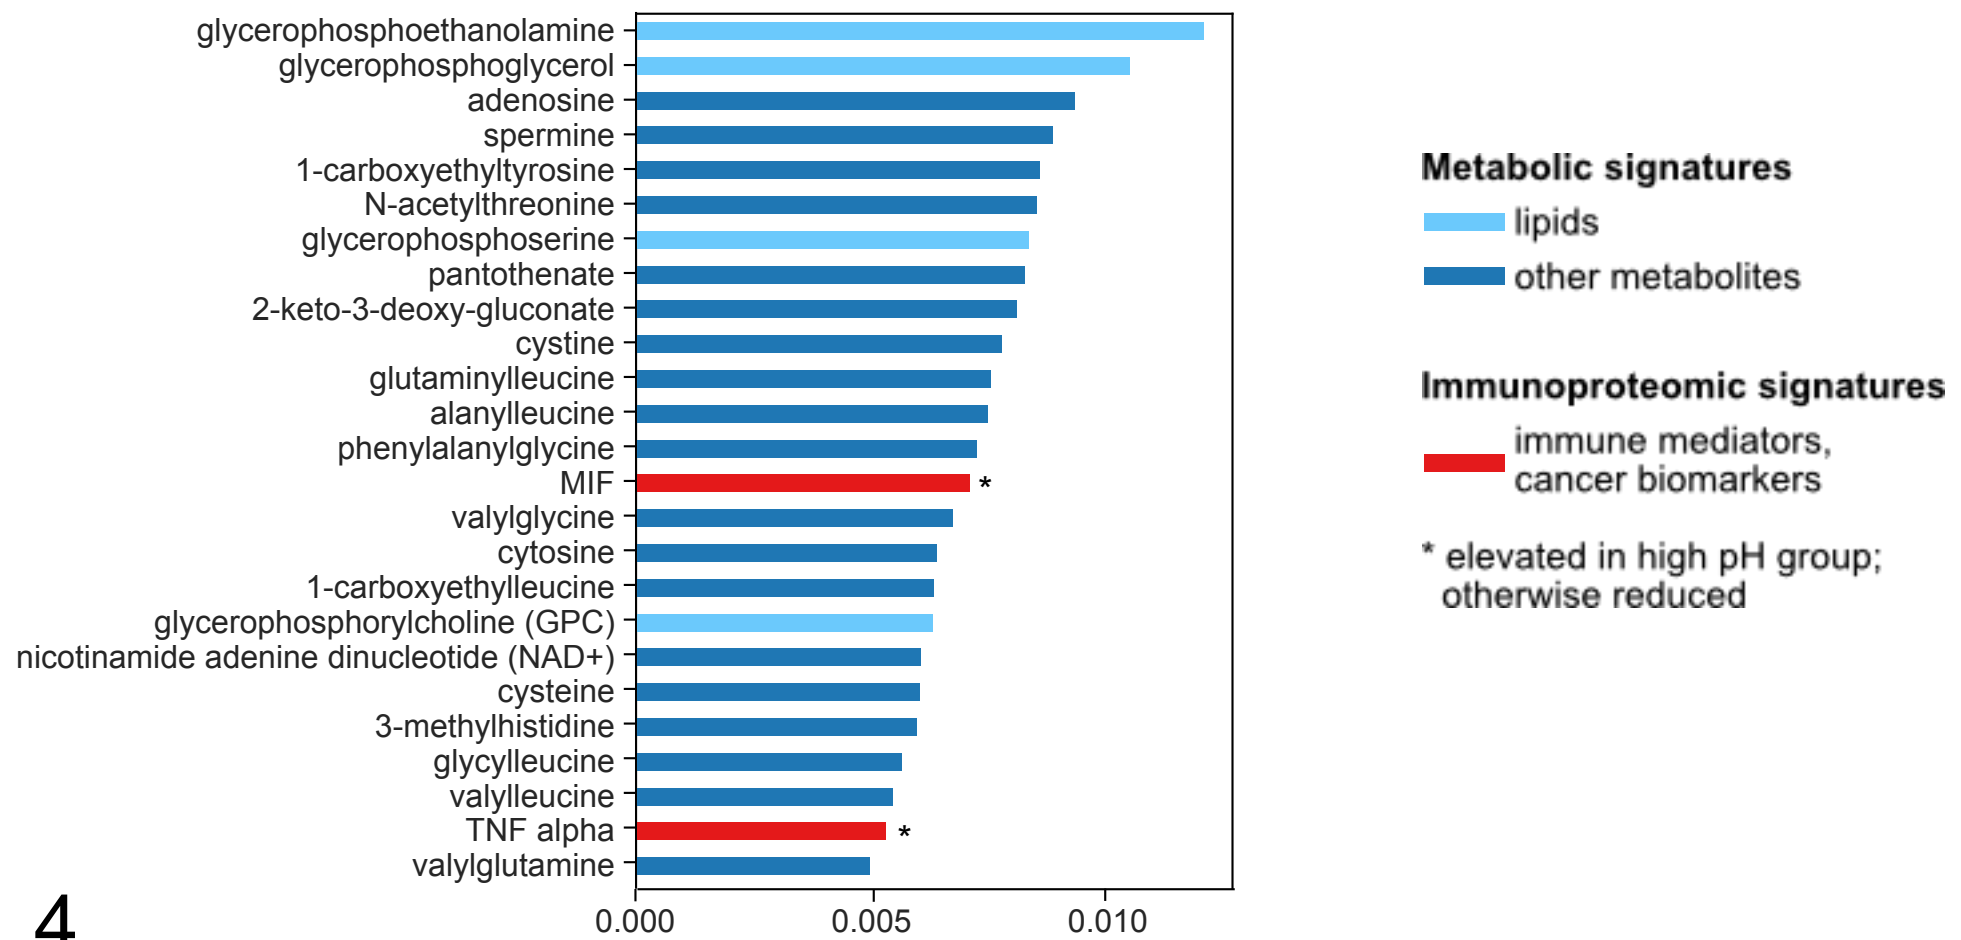

Fig. 4



# Genital Inflammation

## A. Receiver operating characteristics

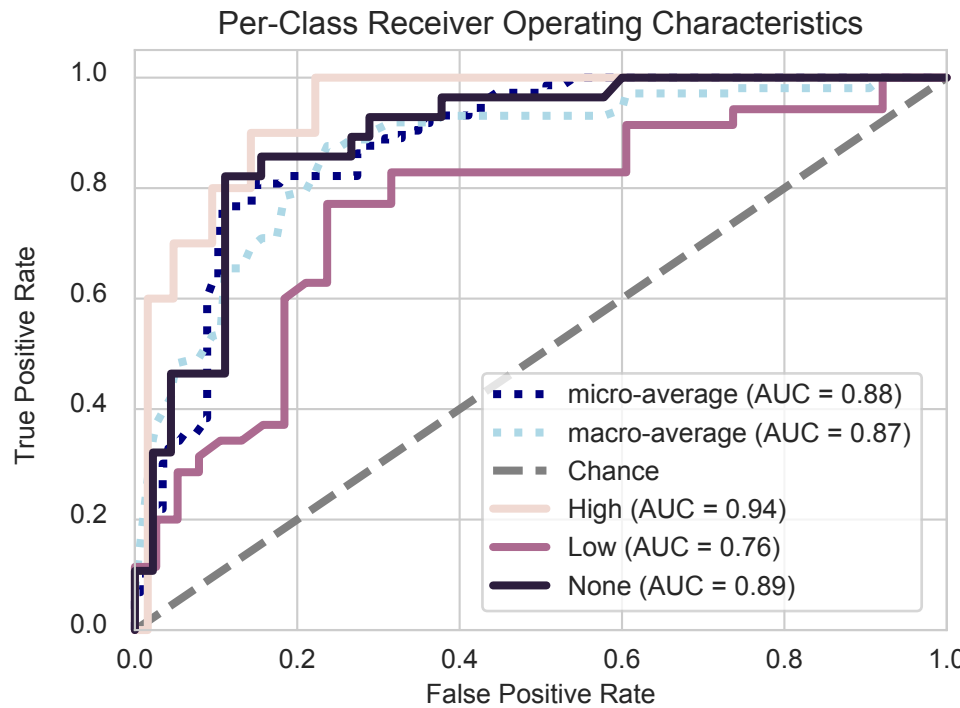

## B. Confusion matrix

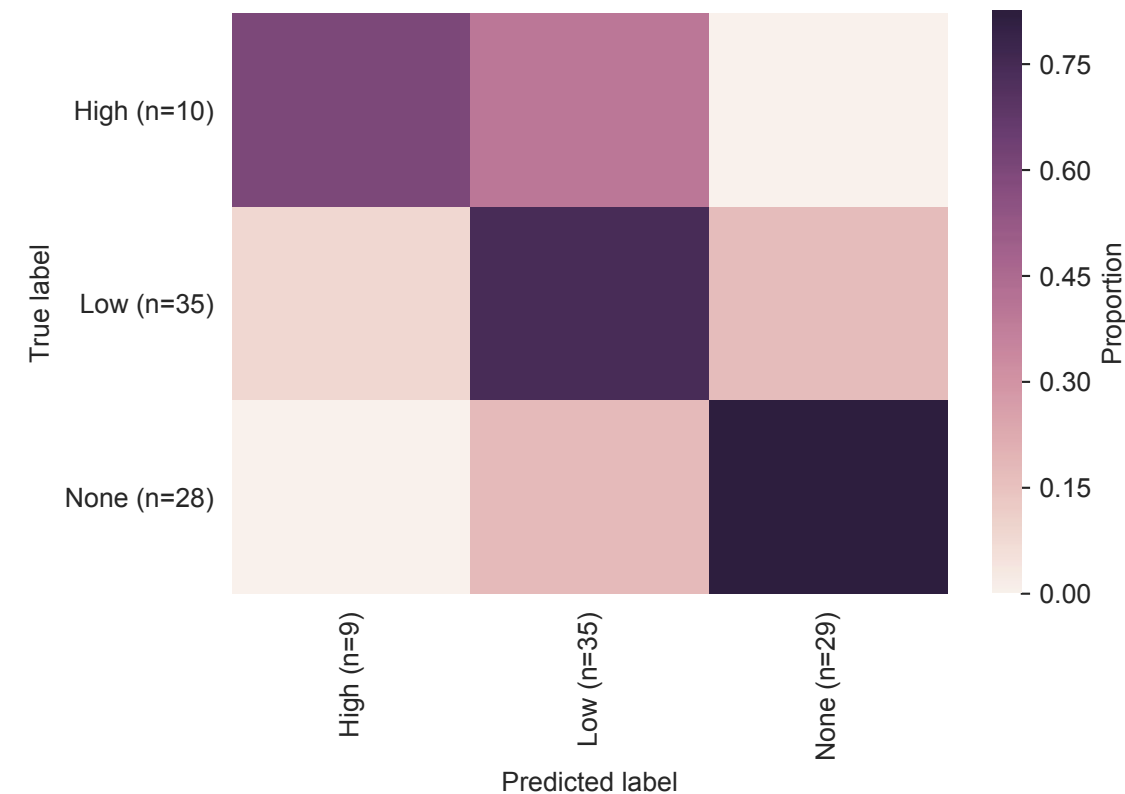

## C. Most predictive features

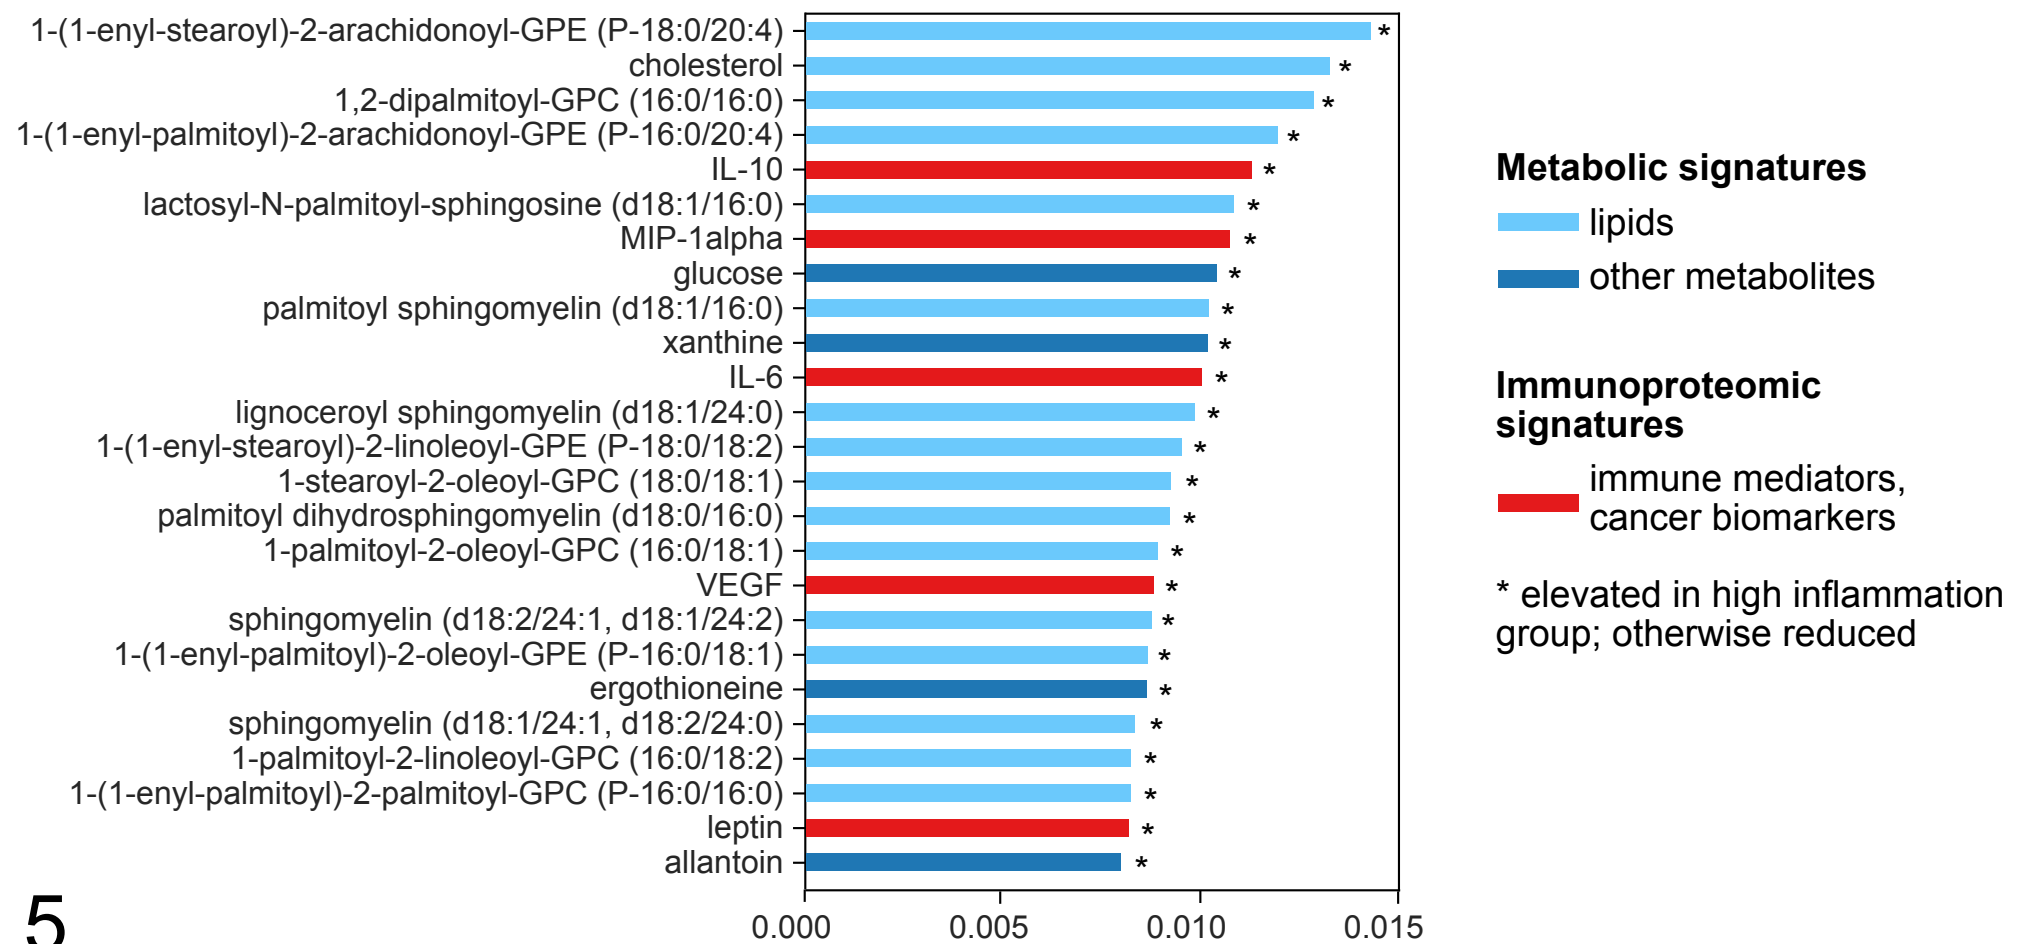

Fig. 5

**A. *Lactobacillus* dominance**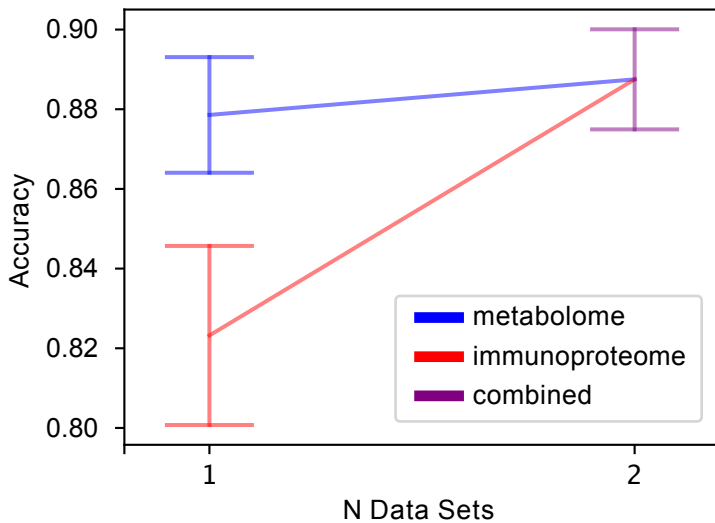**B. Vaginal pH**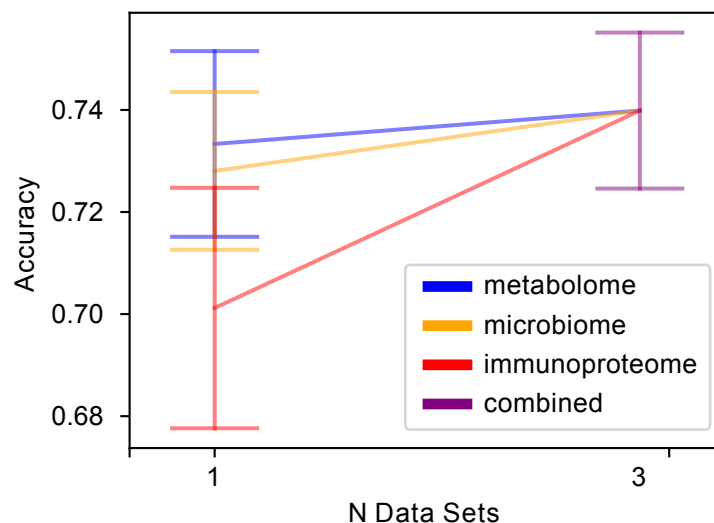**C. Genital inflammation**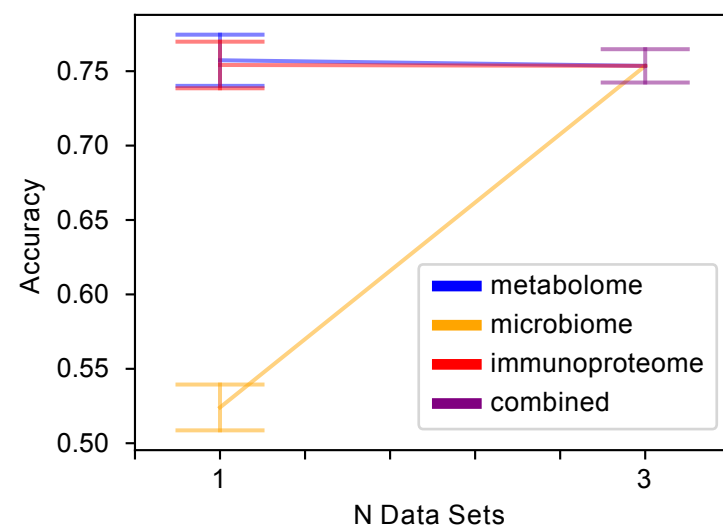**Fig. 6**
